# Supplementary material for: On the nature of fur evolution: A phylogenetic approach in Actinobacteria
Source: PubMed Central journal article supplement (PMC2464607; doi:10.1186/1471-2148-8-185), 2008-06-25

|                    |                                                                          |    |
|--------------------|--------------------------------------------------------------------------|----|
| SAV4029            | MVS--TDWKNDL-----RQRGYRLTPORQLVL                                         | 25 |
| SCO4180            | MVS--TDWKSLL-----RQRGYRLTPORQLVL                                         | 25 |
| Franean1DRAFT_3571 | MAAKVDDWHTRL-----RARGYRLTPORQLVL                                         | 27 |
| Acel_0061          | MPKGSSTRPSTRSAQWQRL-----RSKGYRLTPORRLVL                                  | 35 |
| Noca_4251          | MT--EELAARL-----REQGYRLTPORQLVL                                          | 24 |
| Rxy1_1228          | MMFEQIL-----RSRGYRLTPORRVIV                                              | 23 |
| Rxy1_1140          | MTDPPPPGSLSRVVEKFFQLGGDLEAVLGRM-----RGRGYKVTPORLAVL                      | 48 |
| AAur_2630          | MGFASIPREVSLSMPQCTSSATTGNEAPATSGVKEQRVTKORLAVS                           | 46 |
| Arth_2638          | MAHCAKAEQTKLAPASAGGREQRVTKORLAVS                                         | 33 |
| MAV_2036           | MTFSGDG-----AGVSVRSTRORAAIS                                              | 22 |
| MAP2139            | MTFSGDG-----AGVSVRSTRORAAIS                                              | 22 |
| Mb2380             | MSAAG-----VRSTRORAAIS                                                    | 16 |
| BCG_2373           | MSAAG-----VRSTRORAAIS                                                    | 16 |
| MT2428             | MSAAG-----VRSTRORAAIS                                                    | 16 |
| Rv2359             | MSAAG-----VRSTRORAAIS                                                    | 16 |
| MUL_3612           | MTGTS-----VRSTRORAAIS                                                    | 16 |
| ML0824             | MMTGAS-----VRSTRORAAIS                                                   | 17 |
| MSMEG_4487         | MTGA-----VRSTRORAAIA                                                     | 15 |
| Mvan_3820          | MTGA-----VRSTRORAAIS                                                     | 15 |
| Mjls_3458          | MSPAP-----VRSTRORAAIA                                                    | 16 |
| Mkms_3510          | MSPAP-----VRSTRORAAIA                                                    | 16 |
| Mmcs_3447          | MSPAP-----VRSTRORAAIA                                                    | 16 |
| nfa14570           | MQDKMSAP-----QKP--VGIKSTRORSAIA                                          | 24 |
| RHA1_ro01222       | MTQMTGQ-----RKPVVVGVRAIKORSAIS                                           | 25 |
| SAV5631            | MTTAGSP-----VRGRSTRORAAVA                                                | 20 |
| SCO2508            | MTTAGPP-----VKGRSTRORAAVS                                                | 20 |
| Noca_1934          | MTSTEHAE-----TF--RLRPTTRORRAVL                                           | 22 |
| FRAAL0074          | -----MRATROGDVAIC                                                        | 11 |
| Francia3_0061      | MERRPAPSRGT-----AVRATROGDVAIS                                            | 23 |
| Franean1DRAFT_4289 | MDVVAIVEGERVSSPRGMSAASDRAAGGAGAGSGDRPNGAVSRPGRGRGT-----SVRATROGDVAIS     | 62 |
| Tfu_0856           | -----MSSRR--EAVR                                                         | 9  |
| Acel_2085          | MSGSSSEGR-----QSRSTRORAKALA                                              | 20 |
| BAD_0517           | MSEHI-----VRQTRQKDAIR                                                    | 16 |
| BL1128             | MTLPMVEHI-----ERQTKQKDAIR                                                | 20 |
| Lxxx25010          | MV-----KRNFWOREAVR                                                       | 13 |
| CE2180             | MLKKPSRPLRSRIRGNHCFPDSQEGGMGLNRHGEKS-----TPKLGVRSTRORRAVAV               | 53 |
| NCg12200           | MGINRISQGS-----APKLGVRSTRORRAVAV                                         | 26 |
| DIP1710            | MNRTIDRS-----VFKLGVRSTRORRAVAV                                           | 24 |
| jk0612             | MSNFAITNK-----LEKIGQRNTRORRAVA                                           | 24 |
| PPA0948            | MENRR-----RTTKORLAIR                                                     | 15 |
| FRAAL5117          | -----MAVL                                                                | 4  |
| Francia3_3112      | MNDQI-----DLRLTPORMAVL                                                   | 17 |
| Franean1DRAFT_4643 | MPERT-----ELRLTPORTRVL                                                   | 17 |
| FRAAL2798          | MEDRRFVGAAAATAAAGHDALPGRDDLAAAGIAELR-----ALGERVTPARRAVL                  | 51 |
| Francia3_2661      | MKDTWIVKDSQTRD-----GRRGDPASAAGIAAALR-----ARGERVTPARRAVL                  | 44 |
| Rxy1_1144          | -----MSFRRRTROREAIL                                                      | 14 |
| SAV3053            | MSDLLERLR-----GRGWRMTAORRVVA                                             | 23 |
| SCO5206            | MSDLLERLR-----GRGWRMTAORRVVA                                             | 23 |
| Acel_2095          | MRSFVDRLR-----AAGMRVTPARLAVL                                             | 23 |
| Noca_0839          | MAPAEDLR-----AAGLRVTRPRVAVL                                              | 23 |
| Mkms_4974          | -----                                                                    |    |
| Mmcs_4885          | -----                                                                    |    |
| Mjls_5253          | MTFARETTPEARLR-----ASGLRVTAAPRLAVL                                       | 28 |
| MSMEG_6253         | MTVVDHDPKALL-----ASGLRVTAAPRVAVL                                         | 28 |
| FRAAL3168          | MATDRATTLR-----GAGLRVTGPRLAVL                                            | 24 |
| nfa3250            | MHTETAEPDRDLR-----AAGLRVTAPRLAVL                                         | 27 |
| RHA1_ro04308       | MRHDT-DPKAQLR-----EVGLRVTAAPRVAVL                                        | 26 |
| Tfu_0145           | MDDAASLR-----AAGLRVTAARLAIL                                              | 22 |
| Mjls_2712          | MAVVSSSSEYVDQLR-----GADLRVTRPRVAVL                                       | 29 |
| Mmcs_2681          | MITPLGLKSRICLARRPIGVSAQNARDELLTYSKKGDMMAVVSSSSEYVDQLR-----GADLRVTRPRVAVL | 67 |
| Mkms_2726          | MAVVSSSSEYVDQLR-----GADLRVTRPRVAVL                                       | 29 |
| MSMEG_3460         | MPSRAEFEAQLR-----MTDLRVTRPRVAVL                                          | 26 |
| MAV_2752           | -----MADLRVTRPRVAVL                                                      | 14 |
| MAP1669c           | MSSTADYADRLR-----MADLRVTRPRVAVL                                          | 26 |
| MUL_2189           | -----MADLRVTRPRVAVL                                                      | 14 |
| Mb1944c            | MSSVSSIPDYAEQLR-----TADLRVTRPRVAVL                                       | 29 |
| MT1960             | MSSVSSIPDYAEQLR-----TADLRVTRPRVAVL                                       | 29 |
| Rv1909c            | MSSVSSIPDYAEQLR-----TADLRVTRPRVAVL                                       | 29 |
| BCG_1948c          | MSSVSSIPDYAEQLR-----TADLRVTRPRVAVL                                       | 29 |
| RHA1_ro05274       | MPDYAALLR-----GAELRVTRPRVAVL                                             | 23 |
| Mvan_2983          | MTSDYAEALLR-----GADLRVTRPRVAVL                                           | 24 |
| Franean1DRAFT_1681 | MVAWLLSGFLDWFQKMGDEVVVATAEDFRMLR-----GAALRVTRPRVAVL                      | 47 |
| Noca_0874          | MATTIDTRDFPELLR-----GAALRVTRPRVAVL                                       | 24 |
| MSMEG_6383         | ---MTHTTDFEQLLR-----SAGMRVTRPRVAVL                                       | 30 |
| Mvan_3209          | MEPMTEEPDYSAVLR-----SAALRVTRPRVAVL                                       | 29 |
| nfa29490           | MASKVPDFEQLLR-----GASLRVTAORLAVL                                         | 26 |
| SCO0561            | MTASRNSRKPAIADELRL-----RAGLRVTAARVALL                                    | 31 |
| FurS               | MTASF--TPTAEELR-----GAGLRVTAARVALL                                       | 28 |
| AAur_3058          | MMDHTTEQAEWAAALH-----AHGRRVTKORLAVL                                      | 30 |
| Arth_3077          | MVVEHAGQDAWAAALR-----AHGRRVTKORLAVL                                      | 30 |
| Lxxx02790          | MDTAQLEDTLR-----SAGLRVTRGRVAVL                                           | 25 |
| Rxy1_1224          | MAGFCMTERLEEDIREKFR-----RSQVTLTSORRAVL                                   | 33 |
| Mjls_1895          | MAAAVEDGVG-----VLVKKRVQLRRRCDA                                           | 26 |
| ruler              | 1.....10.....20.....30.....40.....50.....60.....70.....80                |    |

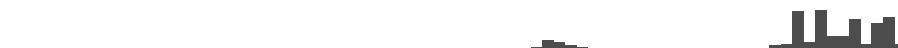

SAV4029 EAVDKLE-HAIPDDILVEVRKKTASGVNISTVVRTLELELEELGLVSHAHLGHGAPT VHLADRH---HHIHLVCRDCTNVIE 101  
SCO4180 EAVDTLE-HAIPDDILGVRKKTASGINISTVVRTLELELEELGLVSHAHLGHGAPT VHLADRH---HHIHLVCRDCTNVIE 101  
Franean1DRAFT 3571 EAVARLG-HAIPPEALVHVEVRQTASGVNISTVVRTLELELEELGLVSHAHLGHGAPT VHTVGD---PHVHLVCGACGAILE 103  
Acel 0061 EAVAAALR-HAIPPEELINIVREVASGVNMSVTVVRTLDLLEELSLVHTHLGHGAPT VHAEDA---GHVHLVCSGCAVTE 111  
Noca 4251 QAVEKLG-HAIPDEVLAEVHAQSSAVNVSTIIVRTLEVLLEELGLVRHAHLSDRAPTVHSVTDR---EHFHLVCRNCHKVVS 100  
Rxy1 1228 RELEGER-HLSAEETIYERVKEHEPELGLSTVVRTLDLLEELGIVRKEDFEGEYSRVELATER---MHHHARCRCGCKVIE 99  
Rxy1 1140 EALAAER-HQSLLEELRGR---PEVGLATLVRTLDLTTGIGAVRRELELGDG-PRVELAGD---HHHHLICEACGEISE 118  
AAur 2630 AALDELDFVSTQELRYRLLNKRGISVSLATAYRILQSLADDGLIDVLRNGDGEAVVRRCAV---TGHHHLLCRNCGKAE 124  
Arth 2638 AALDELDFVSTQELRYRLNQGTSVSLATAYRILQSLADDGLVDVLRNGDGEAVVRRCAV---TGHHHLLCRNCGKAE 111  
MAV 2036 TLELETVDFFRSAQELHDELRRRGENIGLTVVVRTLQSMASAAGLIDTLRDTGESVYRRCSS---EHHHHLLVCRSCGSTIE 99  
MAP2139 TLELETVDFFRSAQELHDELRRRGENIGLTVVVRTLQSMASAAGLIDTLRDTGESVYRRCSS---EHHHHLLVCRSCGSTIE 99  
Mb2380 TLELETVDFFRSAQELHDELRRRGENIGLTVVVRTLQSMASGLVDTLRDTGESVYRRCSS---EHHHHLLVCRSCGSTIE 93  
BCG 2373 TLELETVDFFRSAQELHDELRRRGENIGLTVVVRTLQSMASGLVDTLRDTGESVYRRCSS---EHHHHLLVCRSCGSTIE 93  
MT2428 TLELETVDFFRSAQELHDELRRRGENIGLTVVVRTLQSMASGLVDTLRDTGESVYRRCSS---EHHHHLLVCRSCGSTIE 93  
Rv2359 TLELETVDFFRSAQELHDELRRRGENIGLTVVVRTLQSMASGLVDTLRDTGESVYRRCSS---EHHHHLLVCRSCGSTIE 93  
MUL 3612 TLELETVDFFRSAQELHDELRRRGENIGLTVVVRTLQSMASAGVVDTLRDTGESVYRRCSS---QHHHHLLVCRSCGSTIE 93  
ML0824 TLELETVDFFRSAQELHDELRRRGNISLTVVVRTLQSMASAGVVDTLRDTGESVYRRCSS---RQHHLVCRGCGSTIE 94  
MSMEG 4487 DLLNETIEFRSAQELHDELRRRGENIGLTVVVRTLQAMATAGVVDTLRDTGESVYRRCSS---EHHHHLLVCRSCGSTIE 92  
Mvan 3820 ALLNEDIEFRSAQELHDELRRRGENIGLTVVVRTLQMAAAGVVDTLRDTGESVYRRCSS---EHHHHLLVCRACGCTVE 96  
Mjls 3458 DLLDGLDEFRSAQELHDLAKRRREGIGLTVVVRTLQSMASGLVDVLRDTGESVYRRCSS---ADHHLVCRACGAIVE 93  
Mkms 3510 DLLDGLDEFRSAQELHDLAKRRREGIGLTVVVRTLQSMASGLVDVLRDTGESVYRRCSS---ADHHLVCRACGAIVE 93  
Mmcs 3447 DLLDGLDEFRSAQELHDLAKRRREGIGLTVVVRTLQSMASGLVDVLRDTGESVYRRCSS---ADHHLVCRACGAIVE 93  
nfa14570 ALLGDIDEFRSAQELHDELRRRGENIGLTVVVRTLQSLADAGVVDVLRDTGESVYRRCSS---SGHHHLVCRHCGRTVE 101  
RHA1\_ro01222 ALLDIEIEFRSAQELHDELRRRGENIGLTVVVRTLQSLADAGVVDVLRDTGESVYRRCSS---SGHHHLVCRHCGRTVE 102  
SAV5631 AALDEVDFRSAQELHDMMLKHKGDSVGLTTVVVRTLQNLADAGEVDVLRSDGESVYRRCSS---GEHHHLVCRVCGKAVE 98  
SCO2508 AALQEVDFRSAQELHDMMLKHKGDAVGLTTVVVRTLQSLADAGEVDVLRSAEGESVYRRCST---GDHHLVCRACGKAVE 98  
Noca 1934 EALDSFDFRSAQELHELLGRREGTVGLATVVRTLQVLAAGEVDVLRLEDGEAIVRRCAT---EAHHHLVCRSCGATVE 99  
FRAL0074 AALTEIDAFRSAQELHALLSRGAGVGLTTVVVRHLQVLDVDRGEMVRRDDGETVYRRCAT---EAHHHLVCRCLCGRTVE 89  
Franci3 0061 AALAEIDAFRSAQELHALLSRGAGVGLTTVVVRHLQVLDVDRGEMVRRDDGETVYRRCAT---EAHHHLVCRCLCGRTVE 89  
Franean1DRAFT 4289 SALAAIDAFRSAQELHALLSRGAGVGLTTVVVRHLQVLDVDRGEMVRRDDGETVYRRCAT---EAHHHLVCRCLCGRTVE 140  
Tfu 0856 QALHKSDFRSAQELHALLSRGAGVGLTTVVVRHLQVLDVDRGEMVRRDDGETVYRRCAT---EAHHHLVCRCLCGRTVE 87  
Acel 2085 QVMAESDFRSAQELHEALIDRGEVGLTTVVVRTLQSLADAGEVDVLRSDGESVYRRCST---GEHHHLVCRVCGKAVE 98  
BAD 0517 DALNCGDFRSAQELHDLAKRRREGIGLTVVVRTLQSMASGLVDVLRDTGESVYRRCSS---ADHHLVCRACGAIVE 93  
BL1128 AALADCEEFISADLHRLLEDEGSKIGLATVVRQLNALADAGADTIR-LDGGQLFRLCGD---DGHHHLVCRRCGKAVE 97  
Lxx25010 EALSSTIEGFI SAQGLHLRLHEAGSPIGLATVVRALADLAEGDADSLQSPFEGESLYRRCST---GHHHLICRNCGLTVE 90  
CE2180 DILEEIDNFSAKATHAELNAREHSVGLTTVVVRTLQSLAEIGAVDVLTVTGGELVRQCHD---EGHHHLVCRQCGRTVE 131  
NCg12200 DVLEEIDNFSAKETHHELSTREHNVGLTTVVVRTLQSLADAGEVDVLRSDGESVYRRCST---GEHHHLVCRVCGKAVE 98  
DIP1710 QVLDGLDYFAKAVIHQELTKRDLKVLGTVVVRTLQSLAEIGAVDVLHMSNGELVRHCLV---DEHHHLVCRVCGRTVE 104  
jk0612 ELLEGLTTFSSAQDIDHQLVAGDQHKVGLTTVVVRTLQMAEAGCIDTLYDSDGETLVRACAT---DDHHHLVCRVCGRTVE 102  
PPA0948 ALFDDIEFFLTAQVHQDQLNRGDDQVGLATVVRNLQTMADGEDLDAIRAEDGEMTVYRRCSS---SAHHHLVCRNCGKAVE 92  
FRAL5117 EVLRAADDPHAAEVYRVRASPRIGSATVVRTLALLVSGRALELNLGDGAAARYDAN---TRRHDAVCRGCAIRD 81  
Franci3 3112 AVLAAARDPHAAEVYRVRASPRIGSATVVRTLALLVSGRALELNLGDGAAARYDAN---TSRHDAVCRGCAIRD 94  
Franean1DRAFT 4643 EVLKAARDPHAAEVYRVRASPRIGSATVVRTLALLVSGRALELNLGDGAAARYDAN---TSRHDAVCRGCAIRD 94  
FRAL2768 RVLGATSEHLSVDDVLTTRADEIVPGLHRTVVRALETLQELGLVTVHVHPDHGPAVHSLASSLGGSHLVRRCRCGQI 131  
Franci3 2991 QVLAGTSEHLSVDDVLTTRADEIVPGLHRTVVRALETLQELGLVTVHVHPDHGPAVHSLASSLGGSHLVRRCRCGQI 124  
Rxy1 1144 AALRDAPGPLSAARIREAAREAPGLGRATVVRALRTRLEELVSVVVELPGEPLVSSG---RGEHHHFCRCGGSILD 91  
SAV3053 EVLDGDHVLHAADEVHARAVKLPETISRAVNTLQELVSLGEVLEVAIDKRAKRVDPNAHR---PHHHLVCRACGAIRD 100  
SCO5206 EVLDGDHVLHAADEVHARAVKLPETISRAVNTLQELVSLGEVLEVAIDKRAKRVDPNAHR---PHHHLVCRACGAIRD 100  
Acel 2095 QELVFGV-HRSVDEIATAVRRTLGAVSLQAVNVLDLALAGLVRRIEPLGHPARVESRVS---DNHHHLVCRVCGAIAD 99  
Noca 0839 AEVSEHP-HADVDTLATAARALRGKVSQAVYDVVHALTAGLLRRFPAGSPARFELATG---DNHHHLVCRACHRTVD 99  
Mkms 4974 -----MREALGKVSQAVYDVVHALTAGLLRRFPAGSPARFELATG---DNHHHLVCRACHRTVD 59  
Mmcs 4885 -----MREALGKVSQAVYDVVHALTAGLLRRFPAGSPARFELATG---DNHHHLVCRACHRTVD 59  
Mjls 5253 SALAQAP-HSADDVAKQVREALGKVSQAVYDVVHALTAGLLRRFPAGSPARFELATG---DNHHHLVCRACHRTVD 104  
MSMEG 6253 EVLAEQP-HSADDVAMAVRNLGKVSQAVYDVVHALTAGLLRRFPAGSPARFELATG---DNHHHLVCRACHRTVD 104  
FRAL3168 DVLAEHP-HADADAVAEVRRLGTVSKQAVYDVVHALTAGLLRRFPAGSPARFELATG---DNHHHLVCRACHRTVD 100  
nfa3250 KAVSAHP-HADADTAAEVRALGKVSQAVYDVVHALTAGLLRRFPAGSPARFELATG---DNHHHLVCRACHRTVD 103  
RHA1\_ro04308 NAVAVRP-HSDVDDIAAVVREELGKVSQAVYDVVHALTAGLLRRFPAGSPARFELATG---DNHHHLVCRACHRTVD 102  
Tfu 0145 HDVRRQN-HLDADRVARVREELGKVSQAVYDVVHALTAGLLRRFPAGSPARFELATG---DNHHHLVCRACHRTVD 98  
Mjls 2712 EAVHARP-HADETIFATVRRSLP DVSRQAVYDVVHALTAGLLRRFPAGSPARFELATG---DNHHHLVCRACHRTVD 105  
Mmcs 2681 EAVHARP-HADETIFATVRRSLP DVSRQAVYDVVHALTAGLLRRFPAGSPARFELATG---DNHHHLVCRACHRTVD 143  
Mkms 2726 EAVHARP-HADETIFATVRRSLP DVSRQAVYDVVHALTAGLLRRFPAGSPARFELATG---DNHHHLVCRACHRTVD 105  
MSMEG 3460 EAVHARP-HADETIYSVVRGSLP TVSRQAVYDVVHALTAGLLRRFPAGSPARFELATG---DNHHHLVCRACHRTVD 102  
MAV 2752 EVVDANP-HADETIFSAVRMALP DVSRQAVYDVVHALTAGLLRRFPAGSPARFELATG---DNHHHLVCRACHRTVD 90  
MAP1669c EVVDANP-HADETIFSAVRMALP DVSRQAVYDVVHALTAGLLRRFPAGSPARFELATG---DNHHHLVCRACHRTVD 102  
MUL 2189 EAVGHEP-HADETIYSAVREILP DVSRQAVYDVVHALTAGLLRRFPAGSPARFELATG---DNHHHLVCRACHRTVD 90  
Mb1944c EAVNAHP-HADETIFGAVRFALP DVSRQAVYDVVHALTAGLLRRFPAGSPARFELATG---DNHHHLVCRACHRTVD 105  
MT1960 EAVNAHP-HADETIFGAVRFALP DVSRQAVYDVVHALTAGLLRRFPAGSPARFELATG---DNHHHLVCRACHRTVD 105  
Rv1909c EAVNAHP-HADETIFGAVRFALP DVSRQAVYDVVHALTAGLLRRFPAGSPARFELATG---DNHHHLVCRACHRTVD 105  
BCG 1948c EAVNAHP-HADETIFGAVRFALP DVSRQAVYDVVHALTAGLLRRFPAGSPARFELATG---DNHHHLVCRACHRTVD 105  
RHA1\_ro05274 EAVHARP-HADETIFGAVRFALP DVSRQAVYDVVHALTAGLLRRFPAGSPARFELATG---DNHHHLVCRACHRTVD 99  
Mvan 2983 EAVEARP-HADDTIFGAVRTALPEVSRQAVYDVVHALTAGLLRRFPAGSPARFELATG---DNHHHLVCRACHRTVD 100  
Franean1DRAFT 1681 TAVYARP-HADDSIVGSVREELPEVSRQAVYDVVHALTAGLLRRFPAGSPARFELATG---DNHHHLVCRACHRTVD 123  
Noca 0874 GAVHALP-HADDSIIGAVREGLPEVSRQAVYDVVHALTAGLLRRFPAGSPARFELATG---DNHHHLVCRACHRTVD 106  
MSMEG 6383 RSVYARP-HADDTVIRAVREALPEVSRQAVYDVVHALTAGLLRRFPAGSPARFELATG---DNHHHLVCRACHRTVD 102  
Mvan 3209 HAVGRHP-HADDELINATRELVPDVSRQAVYDVVHALTAGLLRRFPAGSPARFELATG---DNHHHLVCRACHRTVD 105  
nfa29490 SVVHEHP-HSDSDILGRVRESVGA VSRQAVYDVVHALTAGLLRRFPAGSPARFELATG---DNHHHLVCRACHRTVD 102  
SCO5561 EIVTRAGD-HLDAEALTSVRRRVGHVSLQAVYDVVHALTAGLLRRFPAGSPARFELATG---DNHHHLVCRACHRTVD 107  
Fur3 EIVTRDGD-HLGVAEALASVDRVGHVSLQAVYDVVHALTAGLLRRFPAGSPARFELATG---DNHHHLVCRACHRTVD 104  
AAur 3058 AAVQHHP-HSPAEGILAAARKELPETAQSVVYVLDLTDQLMRLRFPAGSPARFELATG---DNHHHLVCRACHRTVD 106  
Arth 3077 TAVERHP-HSPAESILAAAREELPEMTAQSVVYVLDLTDQLMRLRFPAGSPARFELATG---DNHHHLVCRACHRTVD 106  
Lxx02790 SALSDRP-HSADETVLAAPALPAGHSIQNHNVLDLTLRMVRRIEPAHSPALVETRVG---DNHHHLVCRACHRTVD 109  
Rxy1 1224 EALKAEGHPHSAEDVYLVKRNPRVALGTVYQALSVLEIEGVSEKHWSEPTTRDNLNLEP---HLDTRCVRGKAVE 100  
Mjls 1895 ALRRTGLSMSQAVVIRALADHPQASAAELARLCFVTRQSLQDVSTGLRSAGLIDHAQVFPAR---GRARALTTATGRRR 102  
ruler .....90.....100.....110.....120.....130.....140.....150.....160

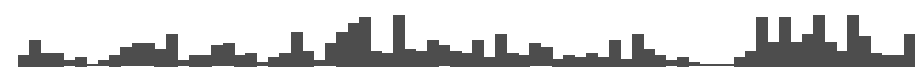

|                    |                                             |                                                      |     |
|--------------------|---------------------------------------------|------------------------------------------------------|-----|
| SAV4029            | ADIG-VAAEFIAKLRETF                          | ---GFD---DMKHFAIFGRCCNCAKLSSTTKS                     | 145 |
| SCO4180            | ADLS-VAADFAKLRQF                            | ---GFD---DMKHFAIFGRCCESCSLKGSTTS                     | 145 |
| Franean1DRAFT_3571 | ISPE-RLAGIVGELRAEL                          | ---GFTVDMDHLLTAGRCACCTAAGRR                          | 144 |
| Acel_0061          | VGSE-VVQSLIQRLDDEH                          | ---GFAADVHFHFAIFGRCTCRSTT                            | 150 |
| Noca_4251          | VDPE-VIGPLAERLVRDH                          | ---GFVIDVGHIAVFGRCCTDCEEDR                           | 139 |
| Rxyl_1228          | FNEE-LMEYLLQVERET                           | ---GFVSDSYEITLHGLCRECAAAG                            | 138 |
| Rxyl_1140          | FEEC-PLDGAGLG                               | ---RIG---GFSFRANSLLEVYGRCAAGR                        | 152 |
| AAur_2630          | VEAP-AVEIWAARIAAEH                          | ---GFTEVAHTVEIFGLCPECTAKKAAGKL                       | 168 |
| Arth_2638          | VEAP-AVEIWAARIAAEH                          | ---GYTEVAHTVEIFGLCPDCTARKADAG                        | 154 |
| MAV_2036           | VGDH-EVEEWATAVAAKH                          | ---GFSVDSHTIEIFGTCSECR                               | 135 |
| MAP2139            | VGDH-EVEEWATAVAAKH                          | ---GFSVDSHTIEIFGTCSECR                               | 135 |
| Mb2380             | VGDH-EVEAWAAEVATKH                          | ---GFSVDSHTIEIFGTCSDCRS                              | 130 |
| BCG_2373           | VGDH-EVEAWAAEVATKH                          | ---GFSVDSHTIEIFGTCSDCRS                              | 130 |
| MT2428             | VGDH-EVEAWAAEVATKH                          | ---GFSVDSHTIEIFGTCSDCRS                              | 130 |
| Rv2359             | VGDH-EVEAWAAEVATKH                          | ---GFSVDSHTIEIFGTCSDCRS                              | 130 |
| MUL_3612           | VADH-EVEIWAANVAARH                          | ---GFSVDSHTIEIFGTCSDCRRPGAAALR                       | 137 |
| ML0824             | VGDH-EVEAWAAEVAAKH                          | ---GFSVDSHTIEIFGTCSECRS                              | 131 |
| MSMEG_4487         | VSGG-DVEIWAQAQVARDH                         | ---GFSVDSHTIEIFGVCQDVERPAGNQT                        | 136 |
| Mvan_3820          | IQGG-QVEIWAAEVAHEH                          | ---GFSVDSHTIEIFGLCSNCA---AGN                         | 131 |
| Mjls_3458          | IQGG-QVEIWAADIAREH                          | ---GFSVDSHTIEIFGLCGDCSAR                             | 131 |
| Mkms_3510          | IQGG-QVEIWAADIAREH                          | ---GFSVDSHTIEIFGLCGDCSAR                             | 131 |
| Mmcs_3447          | IQGG-QVEIWAADIAREH                          | ---GFSVDSHTIEIFGLCGDCSAR                             | 131 |
| nfa14570           | VAGP-TVEAWADALAGEH                          | ---GFTDVSHTIEIFGTCRDCAERRS                           | 141 |
| RHA1_ro01222       | VEGP-TVEQWSQSIADAH                          | ---GFSVDSHTIEIFGLCKDCSATQ                            | 141 |
| SAV5631            | VEGP-AVEKWAEEIAAEH                          | ---GYVNVVAHTVEIFGTCACCAAAKS                          | 138 |
| SCO2508            | VEGP-AVEKWAEEIAAEH                          | ---GYVNVVAHTVEIFGTCADCAAGSGG                         | 139 |
| Noca_1934          | VEGP-AVERWIRAIAAEH                          | ---GYAEVSHTEIFGTCACGG                                | 135 |
| FRAL0074           | IAGP-EIEAWIAAIADAE                          | ---GFVDVHTVEIYGTCCAGCAAGAAS                          | 131 |
| Franci3_0061       | IAGP-EIEAWIAKVANAE                          | ---GFVDVHTVEIYGTCTICAARPAT                           | 142 |
| Franean1DRAFT_4289 | IAGP-EIEAWIASSVASAE                         | ---GFTDVTHTVEIYGTCCARCAASRNSDNSPGRPRGGG              | 192 |
| Tfu_0856           | IEGP-AVESWADELAAQH                          | ---GFVDLTHTEIFGLCSDCAAAPRT                           | 129 |
| Acel_2085          | VKGI-SVERWAERVAARA                          | ---GFVDVHTVEIYGTCCPGCAAGR                            | 138 |
| BAD_0517           | IES---PSESWLKGISDKY                         | ---GFTIERHTLEVFGLCEDCRKADK                           | 132 |
| BL1128             | IDP---PSEAWLRKVADGH                         | ---GFTVESHTLEVFGLCSDCQKEKQAKQAKAVSE                  | 146 |
| Lxxx25010          | IEAD-EVEAWARSAAADH                          | ---GFSQVQHVVDVFGLCAGCS---AKADLAASSAVP                | 138 |
| CE2180             | IDGG-PVERWAGEVARTH                          | ---GFSVSSHAEIIFGLCPACRPPDVTVDQQA                     | 175 |
| NCgl2200           | IDGG-PVEIWAQEIATKN                          | ---GFALSSHEAEIIFGLCADCKEKVT                          | 144 |
| DIP1710            | IDGG-PVEKWAKEVAQLH                          | ---GFQVTGHDAEIVGLCESCSAAE                            | 142 |
| jk0612             | IDGG-FVEDWAAEIAKFF                          | ---GYQKSGHTAEIIFGLCGDCKKKSAS                         | 143 |
| PFA0948            | IGPEKILEDWIRDLAAY                           | ---EFSETGHELELFGICSECSAVHTRSVS                       | 137 |
| FRAL5117           | IDHP-VPDGMAEAIARRS                          | ---GFAITGYDLQFRGMCPCDQANGSDPARAAGGTGPTVNTHAKGALHAEA  | 146 |
| Franci3_3112       | IDHP-VLDGMAAIACRS                           | ---GFAITGYDLRFRGLCPDQANGSGPARGAAGTQQQ                | 146 |
| Franean1DRAFT_4643 | IDHP-VPDGMVAEAIARRS                         | ---GFTITGYDLQFRGLCPECQTAGEGHRPGR                     | 141 |
| FRAL2798           | VPAD-LLDGVDRLARQI                           | ---GFRLOQPDHAALVGLCRPAAAADPPD---HPR                  | 177 |
| Franci3_2661       | VPAD-LLDDVARRLATTV                          | ---GFTLQPDHAALVGLCRACRCSVTSFSDGDLAPA                 | 173 |
| Rxyl_1144          | LPGA-LLRVPAQTLLPG                           | ---GHRVEECSLLLSGSCGCELSREGTR---GPGG                  | 137 |
| SAV3053            | VHPS-GNPLADLPDSERF                          | ---GFTVSDVEVTYRGVCPNCAAA                             | 138 |
| SCO5206            | VHPH-GNPLADLPDSERF                          | ---GFTVSDVEVTYRGVCPNCAAA                             | 138 |
| Acel_2095          | VDCAVGVVPCISPADAAQ                          | ---YLVDEAEVTVWGLCPQCNHRRPSADHGGTITAGPTEKHHVPARGEGGDR | 166 |
| Noca_0839          | VACATGEAPCLQASDDAG                          | ---YLLDEAEVTVWGLCANQO---AAGELELL                     | 143 |
| Mkms_4974          | VDCIVGAAPCLDHAILEDG                         | ---FTVDEAEVVFVWGLCADCRA---EPPAAGASCRIL               | 108 |
| Mmcs_4885          | VDCIVGAAPCLDHAILEDG                         | ---FTVDEAEVVFVWGLCADCRA---EPPAAGASCRIL               | 108 |
| Mjls_5253          | VDCIVGAAPCLLGHPSPRGR                        | ---FHRRRGRSRLGHMGRLSR---G---AAGGRVILPSVTGLA          | 158 |
| MSMEG_6253         | VDCAVGEAPCLPESDLAG                          | ---FAIDAEVTVWGLCADCQH---DS-ATTRPQSSITI               | 154 |
| FRAL3168           | VDCVTEGARPCLEPSDDAG                         | ---FVIEAEVTVWGLVCRDCEP---GDSGSDVPEAR                 | 148 |
| nfa3250            | VDCAVGAAPCLPESSETHG                         | ---YAVDEAEVTVWGLCPDCR---AAQD                         | 143 |
| RHA1_ro04308       | VDCAVGEAPCLDPSAHHG                          | ---FEIDEAEVTVWGLCSQCRT---GAQSGTGSAAALS               | 152 |
| Tfu_0145           | IDCVVGEAPCLAPSQAHG                          | ---YTVDEAEVTVWGLVCPSCKA---KESEH                      | 140 |
| Mjls_2712          | VDCAVGEAPCLMPS-EHDALDGFVLDDEAEVTVWGLCPDCAA  | ---ESSTADSSRSHP                                      | 157 |
| Mmcs_2681          | VDCAVGEAPCLMPS-EHDALDGFVLDDEAEVTVWGLCPDCAA  | ---ESSTADSSRSHP                                      | 195 |
| Mkms_2726          | VDCAVGEAPCLMPS-EHDALDGFVLDDEAEVTVWGLCPDCAA  | ---ESSTADSSRSHP                                      | 157 |
| MSMEG_3460         | VDCAVGEAPCLTFSNDDHALDGFLLDEAEVTVWGLCRECSV   | ---DGP                                               | 146 |
| MAV_2752           | VDCAVGEAPCLTFSDDNVLDGFVLDDEAEVTVWGLCADCST   | ---AGS                                               | 134 |
| MAP1669c           | VDCAVGEAPCLTFSDDNVLDGFVLDDEAEVTVWGLCAECST   | ---AGS                                               | 146 |
| MUL_2189           | IDCAVGEAPCLAPSDDSNVLDGFVLDDEAEVTVWGLMPCDCST | ---AMPRSQP                                           | 138 |
| Mb1944c            | VDCAVGEAPCLTASDHNG                          | ---FLLDEAEVTVWGLCPDCSI---SDTS---RSHP                 | 150 |
| MT1960             | VDCAVGEAPCLTASDHNG                          | ---FLLDEAEVTVWGLCPDCSI---SDTS---RSHP                 | 150 |
| Rv1909c            | VDCAVGEAPCLTASDHNG                          | ---FLLDEAEVTVWGLCPDCSI---SDTS---RSHP                 | 150 |
| BCG_1948c          | VDCAVGEAPCLTASDHNG                          | ---FLLDEAEVTVWGLCPDCSI---SDTS---RSHP                 | 150 |
| RHA1_ro05274       | VDCAVGEAPCLTASDDNG                          | ---FLVEAEVTVWGLCPDCST---SQTS---RSNP                  | 144 |
| Mvan_2983          | VDCAVGEAPCLVPSDDGSLDGFVLDDEAEVTVWGLCPGCLA   | ---AEIS---RSHQ                                       | 149 |
| Franean1DRAFT_1681 | VDCAVGSAPCLAASDDRG                          | ---FSIDEAEVTVWGLCPDCSPPA---TFDRPRAAPDRS              | 174 |
| Noca_0874          | VDCAVGAPCLTASDDHG                           | ---FRIDEAEVTVWGLCPACS---TFRS                         | 146 |
| MSMEG_6383         | VDCAVGEAPCLTGSDDHG                          | ---YALDEAEVTVWGLCPACAQ---DPRAKARTSRSHP               | 153 |
| Mvan_3209          | VDCAVGEAPCLTASDDLQ                          | ---FEVDEAEVTVWGLCPACST---APSPQ                       | 147 |
| nfa29490           | VDCAVGEAPCLDASHDHG                          | ---FVVDEAEVTVWGLCPDCSK---ALSAPPK                     | 146 |
| SCO0561            | VDCAVGDAPCLTASDDRG                          | ---FVIDEAEVTVWGLCPDCST---FGSSPAP                     | 151 |
| FurS               | VDCAVGDAPCLTASDDHG                          | ---FAIDEAEVTVWGLCPDCST---GRSS                        | 145 |
| AAur_3058          | VDCAVGHAPCLTFHWDSNSKP                       | ---MTIQIADVVMVQGIQDCQS---KQLPVTSHVQK                 | 158 |
| Arth_3077          | VDCAVGHAPCLTFHWDSNSKP                       | ---MTIQIADVVMVQGIQDCQR---TQKLPARN                    | 155 |
| Lxxx02790          | VDCVGHAPCLR---LSEAAG                        | ---FAVDTAEVTVWGLCPSCQE---STAATPSRE                   | 147 |
| Rxyl_1224          | VPGVDAGDLESRIQENTP                          | ---YRVTRATMLLEGVCPAQDG                               | 147 |
| Mjls_1895          | LAAAHSAVIAVEEQMLTG                          | ---LSGAECRRLSGLLAAACANLEGE                           | 143 |

ruler .....170.....180.....190.....200.....210.....220.....230.

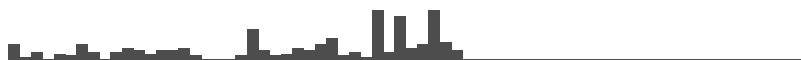

Supplement: 1471-2148-8-185-S1.pdf [file 1471-2148-8-185-S1.pdf]
