# Supplementary material for: On the nature of fur evolution: A phylogenetic approach in Actinobacteria
Source: PubMed Central journal article supplement (PMC2464607; doi:10.1186/1471-2148-8-185), 2008-06-25

\*\*\*\*\* \* \* \* \* \*

|                      |                                                                                   |    |
|----------------------|-----------------------------------------------------------------------------------|----|
| Badolescentis        | --TTTTGTGGAGGGTTCGATTCTGGCTCAGGATGAACGCTGGCGGCGTCTTAAACACATGCAAGTCGAACGGGATCGGC   | 78 |
| Blongum              | --TTTTGTGGAGGGTTCGATTCTGGCTCAGGATGAACGCTGGCGGCGTCTTAAACACATGCAAGTCGAACGGGATCCAT   | 78 |
| Aaurecens            | -----TCAGGATGAACGCTGGCGGCGTCTTAAACACATGCAAGTCGAACGATGATCCC                        | 53 |
| AFB24                | -----AGAGTTTGATCCTGGCTCAGGATGAACGCTGGCGGCGTCTTAAACACATGCAAGTCGAACGATGATCCC        | 69 |
| TTwist               | --TTATTATGGAGAGTTTGATCCTGGCTCAGGACGAACGCTGGCGGCGTCTTAAACACATGCAAGTCGAACGGAAATCAG  | 78 |
| TTW08/27             | --TTATTATGGAGAGTTTGATCCTGGCTCAGGACGAACGCTGGCGGCGTCTTAAACACATGCAAGTCGAACGGAAATCAG  | 78 |
| Lxlyl                | -----CGAACGCTGGCGGCGTCTTAAACACATGCAAGTCGAACGATGAAACA                              | 47 |
| Savermitilis         | --TTTACGGAGAGTTTGATCCTGGCTCAGGACGAACGCTGGCGGCGTCTTAAACACATGCAAGTCGAACGATGA        | 72 |
| Scoelicolor          | --CATTCACGGAGAGTTTGATCCTGGCTCAGGACGAACGCTGGCGGCGTCTTAAACACATGCAAGTCGAACGATGA      | 74 |
| FalniACN14a          | --TTGATGGAGAGTTTGATCCTGGCTCAGGACGAACGCTGGCGGCGTCTTAAACACATGCAAGTCGAGCGAGGGG       | 73 |
| FCcI3                | --TTGATGGAGAGTTTGATCCTGGCTCAGGACGAACGCTGGCGGCGTCTTAAACACATGCAAGTCGAGCGAGGGG       | 73 |
| FEAN1pec             | --TTGATGGAGAGTTTGATCCTGGCTCAGGACGAACGCTGGCGGCGTCTTAAACACATGCAAGTCGAGCGAGGGG       | 73 |
| Acellulolyticus      | -----GTTTGATCCTGGCTCAGGACGAACGCTGGCGGCGTCTTAAACACATGCAAGTCGAGCGAGGGG              | 66 |
| MbovisAF2122/97      | --TTTTGTTTGGAGAGTTTGATCCTGGCTCAGGACGAACGCTGGCGGCGTCTTAAACACATGCAAGTCGAACGGAAAGGTC | 79 |
| MtuberculosisH37Rv   | --TTTTGTTTGGAGAGTTTGATCCTGGCTCAGGACGAACGCTGGCGGCGTCTTAAACACATGCAAGTCGAACGGAAAGGTC | 79 |
| MbovisPasteur        | --TTTTGTTTGGAGAGTTTGATCCTGGCTCAGGACGAACGCTGGCGGCGTCTTAAACACATGCAAGTCGAACGGAAAGGTC | 79 |
| MtuberculosisCDC1551 | --TTTTGTTTGGAGAGTTTGATCCTGGCTCAGGACGAACGCTGGCGGCGTCTTAAACACATGCAAGTCGAACGGAAAGGTC | 78 |
| Mulcerans            | --TTTTGTTTGGAGAGTTTGATCCTGGCTCAGGACGAACGCTGGCGGCGTCTTAAACACATGCAAGTCGAACGGAAAGGTC | 79 |
| Mavium               | -----AGTTTGATCCTGGCTCAGGACGAACGCTGGCGGCGTCTTAAACACATGCAAGTCGAACGGAAAGGTC          | 67 |
| MaviumK-10           | --TTTTGTTTGGAGAGTTTGATCCTGGCTCAGGACGAACGCTGGCGGCGTCTTAAACACATGCAAGTCGAACGGAAAGGTC | 79 |
| MlepraeTN            | --TTTTGTTTGGAGAGTTTGATCCTGGCTCAGGACGAACGCTGGCGGCGTCTTAAACACATGCAAGTCGAACGGAAAGGTC | 78 |
| MJLS                 | -----AGAGTTTGATCTGGCTCAGGACGAACGCTGGCGGCGTCTTAAACACATGCAAGTCGAACGGAAAGGTC         | 69 |
| MKMS                 | -----AGAGTTTGATCTGGCTCAGGACGAACGCTGGCGGCGTCTTAAACACATGCAAGTCGAACGGAAAGGTC         | 69 |
| MMCS                 | -----GAGAGTTTGATCTGGCTCAGGACGAACGCTGGCGGCGTCTTAAACACATGCAAGTCGAACGGAAAGGTC        | 70 |
| Msmegmatis           | TTTTTGTGGAGAGTTTGATCCTGGCTCAGGACGAACGCTGGCGGCGTCTTAAACACATGCAAGTCGAACGGAAAGGTC    | 80 |
| Mvanbaalenii         | -----AGAGTTTGATCTGGCTCAGGACGAACGCTGGCGGCGTCTTAAACACATGCAAGTCGAACGGAAAGGTC         | 69 |
| Nfarcinica           | --TTTCAACGGAGAGTTTGATCCTGGCTCAGGACGAACGCTGGCGGCGTCTTAAACACATGCAAGTCGAGCGTAAAGGCC  | 79 |
| RRH1                 | --TTTCAACGGAGAGTTTGATCCTGGCTCAGGACGAACGCTGGCGGCGTCTTAAACACATGCAAGTCGAGCGTAAAGGCC  | 78 |
| Cdiphtheriae         | -----ACGAACGCTGGCGGCGTCTTAAACACATGCAAGTCGAACGGAAAGGTC                             | 47 |
| Cjeikeium            | -----TATGGAGAGTTTGATCCTGGCTCAGGACGAACGCTGGCGGCGTCTTAAACACATGCAAGTCGAACGGAAAGGTC   | 74 |
| Cefficiens           | -----CTGGCTCAGGACGAACGCTGGCGGCGTCTTAAACACATGCAAGTCGAACGATGAAGC                    | 57 |
| Cglutamicum          | --TGTGGAGAGTTTGATCCTGGCTCAGGACGAACGCTGGCGGCGTCTTAAACACATGCAAGTCGAACGGAAAGGTC      | 73 |
| Nocardioides         | -----AGAGTTTGATCCTGGCTCAGGACGAACGCTGGCGGCGTCTTAAACACATGCAAGTCGAGCGAGGGG           | 69 |
| Pacnes               | -----AGAGTTTGATCCTGGCTCAGGACGAACGCTGGCGGCGTCTTAAACACATGCAAGTCGAACGGAAAGGTC        | 69 |
| TfuscaYX             | -----ACGAACGCTGGCGGCGTCTTAAACACATGCAAGTCGAGCGTAAAGGCC                             | 48 |
| Rxylanophilus        | -----GACGAACGCTGGCGGCGTCTTAAAGCATGCAAGTCGAACGGAAAGGTC                             | 49 |
| ruler                | 1.....10.....20.....30.....40.....50.....60.....70.....80                         |    |

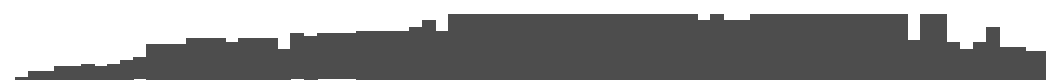

\*\* \* \* \* \* \*

|                      |                                                                                 |     |
|----------------------|---------------------------------------------------------------------------------|-----|
| Badolescentis        | TGGG-----GCTTGCCTCCGGCCGTGAGAGTGGCAACGGGTGAGTAAATGCGTGACCGACCTGCCCATACACC--GGAA | 151 |
| Blongum              | CAGG-----CTTTGCTT--GGTGTGAGAGTGGCAACGGGTGAGTAAATGCGTGACCGACCTGCCCATACACC--GGAA  | 150 |
| Aaurecens            | T--GG-----CTTGCTGG--GGGGATTAGTGGCAACGGGTGAGTAAACAGTGAGTAACTGCCCTTGACTCT--GGGAT  | 122 |
| AFB24                | -----TTTGCTGG--GGG--ATTAGTGGCAACGGGTGAGTAAACAGTGAGTAACTGCCCTTAACCTCT--GGGAT     | 136 |
| TTwist               | GGAG-----CTTGCTCCCTGTGATTAGTGGCAACGGGTGAGTAAACAGTGAGTAACTGCCCTTAACCTTT--GGGAT   | 149 |
| TTW08/27             | GGAG-----CTTGCTCCCTGTGATTAGTGGCAACGGGTGAGTAAACAGTGAGTAACTGCCCTTAACCTTT--GGGAT   | 149 |
| Lxlyl                | GGAG-----CTTGCTCTTGGGAATTAGTGGCAACGGGTGAGTAAACAGTGAGTAACTGCCCTTGACTCT--GGGAT    | 118 |
| Savermitilis         | --AG-----CCCTTCGGGGTGGATTAGTGGCAACGGGTGAGTAAACAGTGAGTAACTGCCCTTGACTCT--GGGAC    | 141 |
| Scoelicolor          | --AC-----CACTTCGGTGGGGATTAGTGGCAACGGGTGAGTAAACAGTGAGTAACTGCCCTTGACTCT--GGGAC    | 143 |
| FalniACN14a          | CTTC-----GGC---TCCTAGCCGGCAACGGGTGAGTAAACAGTGAGTAACTGCCCGAGCTCT--GGAA           | 135 |
| FCcI3                | CTTC-----GGC---TCTCAGCCGGCAACGGGTGAGTAAACAGTGAGTAACTGCCCGAGCTCT--GGAA           | 135 |
| FEAN1pec             | CTT-----GC---TCCTAGCCGGCAACGGGTGAGTAAACAGTGAGTAACTGCCCAAGCTCT--GGAA             | 133 |
| Acellulolyticus      | CTTC-----GGGGTACTCGAGCCGGCAACGGGTGAGTAAACAGTGAGTAACTGCCCGAGCTCT--GGGAT          | 131 |
| MbovisAF2122/97      | TCT-----TCGGAGATACTCGAGTGGCAACGGGTGAGTAAACAGTGAGTAACTGCCCTGCACCTC--GGGAT        | 146 |
| MtuberculosisH37Rv   | TCT-----TCGGAGATACTCGAGTGGCAACGGGTGAGTAAACAGTGAGTAACTGCCCTGCACCTC--GGGAT        | 146 |
| MbovisPasteur        | TCT-----TCGGAGATACTCGAGTGGCAACGGGTGAGTAAACAGTGAGTAACTGCCCTGCACCTC--GGGAT        | 146 |
| MtuberculosisCDC1551 | TCT-----TCGGAGATACTCGAGTGGCAACGGGTGAGTAAACAGTGAGTAACTGCCCTGCACCTC--GGGAT        | 145 |
| Mulcerans            | TCT-----TCGGAGATACTCGAGTGGCAACGGGTGAGTAAACAGTGAGTAACTGCCCTGCACCTC--GGGAT        | 146 |
| Mavium               | TCT-----TCGGAGTACTCGAGTGGCAACGGGTGAGTAAACAGTGAGTAACTGCCCTGCACCTC--GGGAT         | 134 |
| MaviumK-10           | TCT-----TCGGAGTACTCGAGTGGCAACGGGTGAGTAAACAGTGAGTAACTGCCCTGCACCTC--GGGAT         | 146 |
| MlepraeTN            | TCTAAAAAACTTTTTTATGAGATACTCGAGTGGCAACGGGTGAGTAAACAGTGAGTAACTGCCCTGCACCTCAGGGAT  | 158 |
| MJLS                 | CTT-----C--GGGGTACTCGAGTGGCAACGGGTGAGTAAACAGTGAGTAACTGCCCTGCACCTT--GGGAT        | 134 |
| MKMS                 | CTT-----C--GGGGTACTCGAGTGGCAACGGGTGAGTAAACAGTGAGTAACTGCCCTGCACCTT--GGGAT        | 134 |
| MMCS                 | CTT-----C--GGGGTACTCGAGTGGCAACGGGTGAGTAAACAGTGAGTAACTGCCCTGCACCTT--GGGAT        | 135 |
| Msmegmatis           | CTT-----TCGGGGTACTCGAGTGGCAACGGGTGAGTAAACAGTGAGTAACTGCCCTGCACCTT--GGGAT         | 147 |
| Mvanbaalenii         | CTT-----C--GGGGTACTCGAGTGGCAACGGGTGAGTAAACAGTGAGTAACTGCCCTGCACCTT--GGGAT        | 134 |
| Nfarcinica           | CTT-----C--GGGGTACTCGAGTGGCAACGGGTGAGTAAACAGTGAGTAACTGCCCTGCACCTT--GGGAT        | 144 |
| RRH1                 | CTT-----C--GGGGTACTCGAGTGGCAACGGGTGAGTAAACAGTGAGTAACTGCCCTGCACCTT--GGGAT        | 143 |
| Cdiphtheriae         | CTA-----GCTTGTAGG--TACTCGAGTGGCAACGGGTGAGTAAACAGTGAGTAACTGCCCTGCACCTC--GGGAT    | 117 |
| Cjeikeium            | CCTT-----GCTTGCAGGGTACTCGAGTGGCAACGGGTGAGTAAACAGTGAGTAACTGCCCTGCACCTC--GGGAT    | 147 |
| Cefficiens           | CCT-----GCTTGCAG--GG--TGGATTAGTGGCAACGGGTGAGTAAACAGTGAGTAACTGCCCGCCTT--GGGAT    | 127 |
| Cglutamicum          | CAGA-----GCTTGTCTTGG--TGGATTAGTGGCAACGGGTGAGTAAACAGTGAGTAACTGCCCTGCACCTT--GGGAT | 145 |
| Nocardioides         | CT-----TTCCGGGGTACTCGAGTGGCAACGGGTGAGTAAACAGTGAGTAACTGCCCTGCACCTT--GGGAT        | 136 |
| Pacnes               | CTGC-----TTTTGTGGGGTGTCTCGAGTGGCAACGGGTGAGTAAACAGTGAGTAACTGCCCTGCACCTT--GGGAT   | 140 |
| TfuscaYX             | CCTT-----CGGGGGTACTCGAGTGGCAACGGGTGAGTAAACAGTGAGTAACTGCCCTGCACCTT--GGGAT        | 115 |
| Rxylanophilus        | CCTT-----CGGGGGTACTCGAGTGGCAACGGGTGAGTAAACAGTGAGTAACTGCCCTGCACCTT--GGGAT        | 117 |
| ruler                | .....90.....100.....110.....120.....130.....140.....150.....160                 |     |

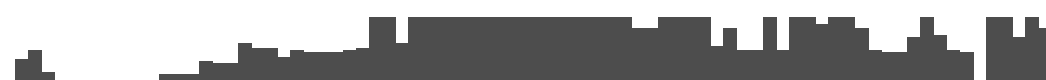



|                      | ***** * ***** ***** ***** ***** ***** ***** ***** *****                        |     |
|----------------------|--------------------------------------------------------------------------------|-----|
| Badollescentis       | GAGGGCGACCGCCACATGGGACTGAGATACGGCCCAGACTCCTACGGGAGGCAGCAGTGGGGAATATTGCACAATGGG | 380 |
| Blongum              | GAGGGCGACCGCCACATGGGACTGAGATACGGCCCAGACTCCTACGGGAGGCAGCAGTGGGGAATATTGCACAATGGG | 378 |
| Aaurescens           | GAGGGTGACCGGCCACTGGGACTGAGACACGGCCCAGACTCCTACGGGAGGCAGCAGTGGGGAATATTGCACAATGGG | 352 |
| AFB24                | GAGGGTGACCGGCCACTGGGACTGAGACACGGCCCAGACTCCTACGGGAGGCAGCAGTGGGGAATATTGCACAATGGG | 366 |
| TTWist               | GAGGGTGATCGGCCACTGGGACTGAGACACGGCCCAGACTCCTACGGGAGGCAGCAGTGGGGAATATTGCACAATGGG | 378 |
| TTW08/27             | GAGGGTGATCGGCCACTGGGACTGAGACACGGCCCAGACTCCTACGGGAGGCAGCAGTGGGGAATATTGCACAATGGG | 378 |
| Lxlyi                | GAGGGTGACCGGCCACTGGGACTGAGACACGGCCCAGACTCCTACGGGAGGCAGCAGTGGGGAATATTGCACAATGGG | 347 |
| Savermitilis         | GAGGGCGACCGCCACTGGGACTGAGACACGGCCCAGACTCCTACGGGAGGCAGCAGTGGGGAATATTGCACAATGGG  | 370 |
| Scoelicolor          | GAGGGCGACCGCCACTGGGACTGAGACACGGCCCAGACTCCTACGGGAGGCAGCAGTGGGGAATATTGCACAATGGG  | 373 |
| FalniACN14a          | GAGGGCGACCGCCACTGGGACTGAGACACGGCCCAGACTCCTACGGGAGGCAGCAGTGGGGAATATTGCACAATGGG  | 364 |
| FCcI3                | GAGGGCGACCGCCACTGGGACTGAGACACGGCCCAGACTCCTACGGGAGGCAGCAGTGGGGAATATTGCACAATGGG  | 364 |
| FEAN1pec             | GAGGGCGATCGGCCACTGGGACTGAGACACGGCCCAGACTCCTACGGGAGGCAGCAGTGGGGAATATTGCACAATGGG | 362 |
| Acellulolyticus      | GAGGGCGACCGCCACTGGGACTGAGACACGGCCCAGACTCCTACGGGAGGCAGCAGTGGGGAATATTGCACAATGGG  | 361 |
| MbovisAF2122/97      | GAGGGTGTCGGGCCACTGGGACTGAGATACGGCCCAGACTCCTACGGGAGGCAGCAGTGGGGAATATTGCACAATGGG | 377 |
| MtuberculosisH37Rv   | GAGGGTGTCGGGCCACTGGGACTGAGATACGGCCCAGACTCCTACGGGAGGCAGCAGTGGGGAATATTGCACAATGGG | 377 |
| MbovisPasteur        | GAGGGTGTCGGGCCACTGGGACTGAGATACGGCCCAGACTCCTACGGGAGGCAGCAGTGGGGAATATTGCACAATGGG | 377 |
| MtuberculosisCDC1551 | GAGGGTGTCGGGCCACTGGGACTGAGATACGGCCCAGACTCCTACGGGAGGCAGCAGTGGGGAATATTGCACAATGGG | 376 |
| Mulcerans            | GAGGGTGTCGGGCCACTGGGACTGAGATACGGCCCAGACTCCTACGGGAGGCAGCAGTGGGGAATATTGCACAATGGG | 375 |
| Mavium               | GAGGGTGTCGGGCCACTGGGACTGAGATACGGCCCAGACTCCTACGGGAGGCAGCAGTGGGGAATATTGCACAATGGG | 363 |
| MaviumK-10           | GAGGGTGTCGGGCCACTGGGACTGAGATACGGCCCAGACTCCTACGGGAGGCAGCAGTGGGGAATATTGCACAATGGG | 375 |
| MlepraeTN            | GAGGGTGACCGCCACTGGGACTGAGATACGGCCCAGACTCCTACGGGAGGCAGCAGTGGGGAATATTGCACAATGGG  | 388 |
| MJLS                 | GAGGGTGACCGCCACTGGGACTGAGATACGGCCCAGACTCCTACGGGAGGCAGCAGTGGGGAATATTGCACAATGGG  | 365 |
| MKMS                 | GAGGGTGACCGCCACTGGGACTGAGATACGGCCCAGACTCCTACGGGAGGCAGCAGTGGGGAATATTGCACAATGGG  | 365 |
| MMCS                 | GAGGGTGACCGCCACTGGGACTGAGATACGGCCCAGACTCCTACGGGAGGCAGCAGTGGGGAATATTGCACAATGGG  | 366 |
| Msmegmatis           | GAGGGTGACCGCCACTGGGACTGAGATACGGCCCAGACTCCTACGGGAGGCAGCAGTGGGGAATATTGCACAATGGG  | 378 |
| Mvanbaalenii         | GAGGGTGACCGCCACTGGGACTGAGATACGGCCCAGACTCCTACGGGAGGCAGCAGTGGGGAATATTGCACAATGGG  | 365 |
| Nfarcinica           | GAGGGCGACCGCCACTGGGACTGAGACACGGCCCAGACTCCTACGGGAGGCAGCAGTGGGGAATATTGCACAATGGG  | 373 |
| RRH1                 | GAGGGTGACCGCCACTGGGACTGAGACACGGCCCAGACTCCTACGGGAGGCAGCAGTGGGGAATATTGCACAATGGG  | 372 |
| Cdiphtheriae         | GAGGGTGACCGCCACTGGGACTGAGATACGGCCCAGACTCCTACGGGAGGCAGCAGTGGGGAATATTGCACAATGGG  | 344 |
| Cjeikeium            | GAGGGTGACCGCCACTGGGACTGAGACACGGCCCAGACTCCTACGGGAGGCAGCAGTGGGGAATATTGCACAATGGG  | 374 |
| Cefficiens           | GAGGGTGATCGGCCACTGGGACTGAGACACGGCCCAGACTCCTACGGGAGGCAGCAGTGGGGAATATTGCACAATGGG | 355 |
| Cglutamium           | GAGGGTGATCGGCCACTGGGACTGAGACACGGCCCAGACTCCTACGGGAGGCAGCAGTGGGGAATATTGCACAATGGG | 373 |
| Nocardioides         | GAGGGTGACCGCCACTGGGACTGAGACACGGCCCAGACTCCTACGGGAGGCAGCAGTGGGGAATATTGCACAATGGG  | 366 |
| Pacnes               | GAGGGTGACCGCCACTGGGACTGAGATACGGCCCAGACTCCTACGGGAGGCAGCAGTGGGGAATATTGCACAATGGG  | 369 |
| TfuscaYX             | GAGGGCGACCGCCACTGGGACTGAGACACGGCCCAGACTCCTACGGGAGGCAGCAGTGGGGAATATTGCACAATGGG  | 347 |
| Rxylanophilus        | GAGGGTGGTCAGCCACTGGGACTGAGACACGGCCCAGACTCCTACGGGAGGCAGCAGTGGGGAATATTGCACAATGGG | 356 |
| ruler                | .....330.....340.....350.....360.....370.....380.....390.....400               |     |

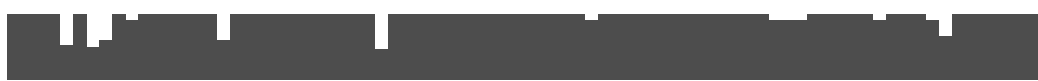

|                      | ** ***** ** ***** ***** ***** ***** ***** ***** ***** *****                        |     |
|----------------------|------------------------------------------------------------------------------------|-----|
| Badollescentis       | CGCAAGCCTGATGCAGCGACGCCCGCTGGGGATGACGGCCTTCGGGTTGTAAACCGCTTTGACTGGGAGCAAG--CCC     | 458 |
| Blongum              | CGCAAGCCTGATGCAGCGACGCCCGCTGAGGGATGGAGGCCCTTCGGGTTGTAAACCTCTTTATCGGGGAGCAAG--CG-   | 455 |
| Aaurescens           | CGCAAGCCTGATGCAGCGACGCCCGCTGAGGGATGACGGCCTTCGGGTTGTAAACCTCTTTAGTAGGGGAAGAAG--CGA   | 430 |
| AFB24                | CGAAAGCCTGATGCAGCGACGCCCGCTGAGGGATGACGGCCTTCGGGTTGTAAACCTCTTTAGTAGGGGAAGAAG--CGA   | 444 |
| TTWist               | CGCAAGCCTGATGCAGCAACGCCCGCTGGGGGAAAGAGGCCCTTCGGGTTGTAAACCTCTTTGGCAGGGGAAGAAG--CGA  | 456 |
| TTW08/27             | CGCAAGCCTGATGCAGCAACGCCCGCTGGGGGAAAGAGGCCCTTCGGGTTGTAAACCTCTTTGGCAGGGGAAGAAG--CGA  | 456 |
| Lxlyi                | CGAAAGCCTGATGCAGCAACGCCCGCTGAGGGATGACGGCCTTCGGGTTGTAAACCTCTTTAGTAGGGGAAGAAG--CGA   | 425 |
| Savermitilis         | CGAAAGCCTGATGCAGCGACGCCCGCTGAGGGATGACGGCCTTCGGGTTGTAAACCTCTTTAGTAGGGGAAGAAG--CGA   | 448 |
| Scoelicolor          | CGAAAGCCTGATGCAGCGACGCCCGCTGAGGGATGACGGCCTTCGGGTTGTAAACCTCTTTAGTAGGGGAAGAAG--CGA   | 451 |
| FalniACN14a          | CGAAAGCCTGATGCAGCGACGCCCGCTGGGGGATGACGGCCTTCGGGTTGTAAACCTCTTTAGTAGGGGAAGAAG--CGC   | 442 |
| FCcI3                | CGAAAGCCTGATGCAGCGACGCCCGCTGGGGGATGACGGCCTTCGGGTTGTAAACCTCTTTAGTAGGGGAAGAAG--CGA   | 442 |
| FEAN1pec             | CGAAAGCCTGATGCAGCGACGCCCGCTGAGGGATGACGGCCTTCGGGTTGTAAACCTCTTTAGTAGGGGAAGAAG--CGA   | 440 |
| Acellulolyticus      | CGAAAGCCTGATGCAGCGACGCCCGCTGGGGGAAAGAGGCCCTTCGGGTTGTAAACCTCTTTAGTAGGGGAAGAAG--CGA  | 439 |
| MbovisAF2122/97      | CGCAAGCCTGATGCAGCGACGCCCGCTGGGGGATGACGGCCTTCGGGTTGTAAACCTCTTTAGTAGGGGAAGAAG--GTC   | 455 |
| MtuberculosisH37Rv   | CGCAAGCCTGATGCAGCGACGCCCGCTGGGGGATGACGGCCTTCGGGTTGTAAACCTCTTTAGTAGGGGAAGAAG--GTC   | 455 |
| MbovisPasteur        | CGCAAGCCTGATGCAGCGACGCCCGCTGGGGGATGACGGCCTTCGGGTTGTAAACCTCTTTAGTAGGGGAAGAAG--GTC   | 455 |
| MtuberculosisCDC1551 | CGCAAGCCTGATGCAGCGACGCCCGCTGGGGGATGACGGCCTTCGGGTTGTAAACCTCTTTAGTAGGGGAAGAAG--GTC   | 454 |
| Mulcerans            | CGCAAGCCTGATGCAGCGACGCCCGCTGGGGGATGACGGCCTTCGGGTTGTAAACCTCTTTAGTAGGGGAAGAAG--GTC   | 453 |
| Mavium               | CGCAAGCCTGATGCAGCGACGCCCGCTGGGGGATGACGGCCTTCGGGTTGTAAACCTCTTTAGTAGGGGAAGAAG--GTC   | 441 |
| MaviumK-10           | CGCAAGCCTGATGCAGCGACGCCCGCTGGGGGATGACGGCCTTCGGGTTGTAAACCTCTTTAGTAGGGGAAGAAG--GTC   | 453 |
| MlepraeTN            | CGCAAGCCTGATGCAGCGACGCCCGCTGGGGGATGACGGCCTTCGGGTTGTAAACCTCTTTAGTAGGGGAAGAAG--GTC   | 466 |
| MJLS                 | CGCAAGCCTGATGCAGCGACGCCCGCTGGGGGATGACGGCCTTCGGGTTGTAAACCTCTTTAGTAGGGGAAGAAG--GTC   | 443 |
| MKMS                 | CGCAAGCCTGATGCAGCGACGCCCGCTGGGGGATGACGGCCTTCGGGTTGTAAACCTCTTTAGTAGGGGAAGAAG--GTC   | 443 |
| MMCS                 | CGCAAGCCTGATGCAGCGACGCCCGCTGGGGGATGACGGCCTTCGGGTTGTAAACCTCTTTAGTAGGGGAAGAAG--GTC   | 444 |
| Msmegmatis           | CGCAAGCCTGATGCAGCGACGCCCGCTGAGGGATGACGGCCTTCGGGTTGTAAACCTCTTTAGTAGGGGAAGAAG--GTC   | 456 |
| Mvanbaalenii         | CGCAAGCCTGATGCAGCGACGCCCGCTGAGGGATGACGGCCTTCGGGTTGTAAACCTCTTTAGTAGGGGAAGAAG--GTC   | 443 |
| Nfarcinica           | CGAAAGCCTGATGCAGCGACGCCCGCTGAGGGATGACGGCCTTCGGGTTGTAAACCTCTTTAGTAGGGGAAGAAG--GTC   | 451 |
| RRH1                 | CGAAAGCCTGATGCAGCGACGCCCGCTGAGGGATGACGGCCTTCGGGTTGTAAACCTCTTTAGTAGGGGAAGAAG--GTC   | 450 |
| Cdiphtheriae         | CGCAAGCCTGATGCAGCGACGCCCGCTGGGGGATGACGGCCTTCGGGTTGTAAACCTCTTTAGTAGGGGAAGAAG--GTC   | 422 |
| Cjeikeium            | CGCAAGCCTGATGCAGCGACGCCCGCTGGGGGATGACGGCCTTCGGGTTGTAAACCTCTTTAGTAGGGGAAGAAG--GTC   | 452 |
| Cefficiens           | CGCAAGCCTGATGCAGCGACGCCCGCTGGGGGATGACGGCCTTCGGGTTGTAAACCTCTTTAGTAGGGGAAGAAG--GTC   | 433 |
| Cglutamium           | CGCAAGCCTGATGCAGCGACGCCCGCTGGGGGATGACGGCCTTCGGGTTGTAAACCTCTTTAGTAGGGGAAGAAG--GTC   | 451 |
| Nocardioides         | CGGAAGCCTGATGCAGCAACGCCCGCTGAGGGATGACGGCCTTCGGGTTGTAAACCTCTTTAGTAGGGGAAGAAG--GTC   | 444 |
| Pacnes               | CGGAAGCCTGATGCAGCAACGCCCGCTGAGGGATGACGGCCTTCGGGTTGTAAACCTCTTTAGTAGGGGAAGAAG--GTC   | 447 |
| TfuscaYX             | CGCAAGCCTGATGCAGCGACGCCCGCTGGGGGATGAGAGGCCCTTCGGGTTGTAAACCTCTTTAGTAGGGGAAGAAG--GTC | 427 |
| Rxylanophilus        | CGAAAGCCTGATGCAGCAACGCCCGCTGGGGGATGAGAGGCCCTTCGGGTTGTAAACCTCTTTAGTAGGGGAAGAAG--GTC | 436 |
| ruler                | .....410.....420.....430.....440.....450.....460.....470.....480                   |     |

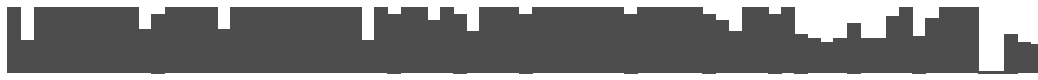

Badolescentis **TTTC**-----GGGGT**GAGTGTACCTTT**CGAAT**AAGCA**CCGGC**TAACTA**CGT**GCCAGCAGCCGCGGTAATACGTA** 525  
Blongum -----AGAGT**GAGTTTACCCGTT**GAA**T**AAGCA**CCGGC**TAACTA**CGT**GCCAGCAGCCGCGGTAATACGTA 519  
Aaurens **AAG**-----TGACGGT**ACCTGC**AGAAGAAGCG**CCGGC**TAACTA**CGT**GCCAGCAGCCGCGGTAATACGTA 493  
AFB24 **AAG**-----TGACGGT**ACCTGC**AGAAGAAGCG**CCGGC**TAACTA**CGT**GCCAGCAGCCGCGGTAATACGTA 507  
TTWist **AAG**-----TGACGGT**ACCTGC**AGAAAAAGCG**CCGGC**TAACTA**CGT**GCCAGCAGCCGCGGTAATACGTA 519  
TTW08/27 **AAG**-----TGACGGT**ACCTGC**AGAAAAAGCG**CCGGC**TAACTA**CGT**GCCAGCAGCCGCGGTAATACGTA 519  
Lxlyi **AAG**-----TGACGGT**ACCTGC**AGAAAAAGCG**CCGGC**TAACTA**CGT**GCCAGCAGCCGCGGTAATACGTA 488  
Savermitilis **AAG**-----TGACGGT**ACCTGC**AGAAGAAGCG**CCGGC**TAACTA**CGT**GCCAGCAGCCGCGGTAATACGTA 511  
Scoelicolor **AAG**-----TGACGGT**ACCTGC**AGAAGAAGCG**CCGGC**TAACTA**CGT**GCCAGCAGCCGCGGTAATACGTA 514  
FalniACN14a **AAG**-----TGACGGT**ACCTGC**AGAAGAAGCG**CCGGC**TAACTA**CGT**GCCAGCAGCCGCGGTAATACGTA 505  
FCcI3 **GAG**-----TGACGGT**ACCTGC**AGAAGAAGCG**CCGGC**TAACTA**CGT**GCCAGCAGCCGCGGTAATACGTA 505  
FEAN1pec **GAG**-----TGACGGT**ACCTGC**AGAAGAAGCG**CCGGC**TAACTA**CGT**GCCAGCAGCCGCGGTAATACGTA 503  
Acellulolyticus **AAG**-----TGACGGT**ACCTGC**AGAAGAAGCG**CCGGC**TAACTA**CGT**GCCAGCAGCCGCGGTAATACGTA 502  
MbovisAF2122/97 **CGGGTTCTCTC**---GGATT**GACGGTAGGT**GGAGAAGAAGCA**CCGGCCAACTA**CGT**GCCAGCAGCCGCGGTAATACGTA** 530  
MtberculosisH37Rv **CGGGTTCTCTC**---GGATT**GACGGTAGGT**GGAGAAGAAGCA**CCGGCCAACTA**CGT**GCCAGCAGCCGCGGTAATACGTA** 530  
MbovisPasteur **CGGGTTCTCTC**---GGATT**GACGGTAGGT**GGAGAAGAAGCA**CCGGCCAACTA**CGT**GCCAGCAGCCGCGGTAATACGTA** 530  
MtberculosisCDC1551 **CGGGTTCTCTC**---GGATT**GACGGTAGGT**GGAGAAGAAGCA**CCGGCCAACTA**CGT**GCCAGCAGCCGCGGTAATACGTA** 529  
Mulcerans **CGGGTTTTCTC**---GGATT**GACGGTAGGT**GGAGAAGAAGCA**CCGGCCAACTA**CGT**GCCAGCAGCCGCGGTAATACGTA** 528  
Mavium **CGGGTTTTCTC**---GGATT**GACGGTAGGT**GGAGAAGAAGCA**CCGGCCAACTA**CGT**GCCAGCAGCCGCGGTAATACGTA** 516  
MaviumK-10 **CGGGTTTTCTC**---GGATT**GACGGTAGGT**GGAGAAGAAGCA**CCGGCCAACTA**CGT**GCCAGCAGCCGCGGTAATACGTA** 528  
MlepraeTN **TGGGTTTTCTC**---GGATT**GACGGTAGGT**GGAGAAGAAGCA**CCGGCCAACTA**CGT**GCCAGCAGCCGCGGTAATACGTA** 541  
MJLS **AAG**-----TGACGGT**ACCTACA**AGAAGAAGGA**CCGGCCAACTA**CGT**GCCAGCAGCCGCGGTAATACGTA** 506  
MKMS **AAG**-----TGACGGT**ACCTACA**AGAAGAAGGA**CCGGCCAACTA**CGT**GCCAGCAGCCGCGGTAATACGTA** 506  
MMCS **AAG**-----TGACGGT**ACCTACA**AGAAGAAGGA**CCGGCCAACTA**CGT**GCCAGCAGCCGCGGTAATACGTA** 507  
Msmegmatis **AAG**-----TGACGGT**ATGTG**CAGAAGAAGGA**CCGGCCAACTA**CGT**GCCAGCAGCCGCGGTAATACGTA** 519  
Mvanbaalenii **AAG**-----TGACGGT**ACCTG**AGAAGAAGGA**CCGGCCAACTA**CGT**GCCAGCAGCCGCGGTAATACGTA** 506  
Nfarcinica **AAG**-----TGACGGT**ACCTG**AGAAGAAGCA**CCGGCCAACTA**CGT**GCCAGCAGCCGCGGTAATACGTA** 514  
RRH1 **AAG**-----TGACGGT**ACCTG**CAGAAGAAGCA**CCGGC**TAACTA**CGT**GCCAGCAGCCGCGGTAATACGTA 513  
Cdiphtheriae **TTGTG**-----ACGGT**TACCTAGATA**AAGAAGCA**CCGGC**TAACTA**CGT**GCCAGCAGCCGCGGTAATACGTA 485  
Cjeikeium **CTGTG**GGG-----TGACGGT**ACCTG**GATAAGAAGCA**CCGGC**TAACTA**CGT**GCCAGCAGCCGCGGTAATACGTA 520  
Cefficiens **TT--GT**-----GACGGT**ACCTG**AGAAGAAGCA**CCGGC**TAACTA**CGT**GCCAGCAGCCGCGGTAATACGTA 496  
Cglutamicum **TATGTT**-----GACGGT**ACCTG**AGAAGAAGCA**CCGGC**TAACTA**CGT**GCCAGCAGCCGCGGTAATACGTA 516  
Nocardioides **CGGTGATGGT**-----GGT**GACGGTAGGT**ACAAGAAGCA**CCGGCCAACTA**CGT**GCCAGCAGCCGCGGTAATACGTA** 516  
Pacnes **GAGTGACGGT**-----AATG--GGTA-----AAGAAGA**CCGGC**TAACTA**CGT**GCCAGCAGCCGCGGTAATACGTA 510  
TfuscaYX **TGGTTTTCTGG**---GGGTT**GACGGTAGGT**GTTGA**T**AAGAAGCA**CCGGC**TAACTA**CGT**GCCAGCAGCCGCGGTAATACGTA 502  
Rxylianophilus **AGGGTTAATAGCCCC**TAGCCT**GACGGTACCCGAC**GAGGAAG**CCCCGGC**TAACTA**CGT**GCCAGCAGCCGCGGTAATACGTA 516  
ruler .....490.....500.....510.....520.....530.....540.....550.....560

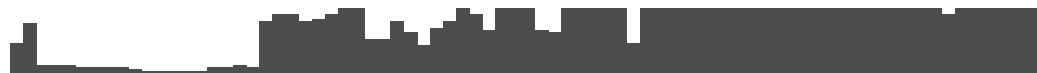

Badolescentis **GGGTGCAAGCGTTATCCGGAA**TATTGGGCGT**AAAGGGCT**CGTAGGCGGTT**CGT**CGCGT**CCGGTGT**GAAAGT**CCAT**CGCT 605  
Blongum **GGGTGCAAGCGTTATCCGGAA**TATTGGGCGT**AAAGGGCT**CGTAGGCGGTT**CGT**CGCGT**CCGGTGT**GAAAGT**CCAT**CGCT 599  
Aaurens **GGGCGCAAGCGTTATCCGGAA**TATTGGGCGT**AAAGAGCT**CGTAGGCGGTT**TGT**CGCGT**CTGCTGT**GAAAGA**CCGGGGCT** 573  
AFB24 **GGGCGCAAGCGTTATCCGGAA**TATTGGGCGT**AAAGAGCT**CGTAGGCGGTT**TGT**CGCGT**CTGCGCT**GAAAAT**CCGGGGCT** 587  
TTWist **GGGCGCGAGCGTTGTCCGGAA**TATTGGGCGT**AAAGAGCT**CGTAGGCGGTT**TGT**CACGT**CTGCCGT**GAAAA**CCGAGGCT** 599  
TTW08/27 **GGGCGCGAGCGTTGTCCGGAA**TATTGGGCGT**AAAGAGCT**CGTAGGCGGTT**TGT**CACGT**CTGCCGT**GAAAA**CCGAGGCT** 599  
Lxlyi **GGGTGCGAGCGTTGTCCGGAA**TATTGGGCGT**AAAGAGCT**CGTAGGCGGTT**TGT**CGCGT**CTGCTGT**GAAAA**CCCGAGGCT** 568  
Savermitilis **GGGCGCAAGCGTTGTCCGGAA**TATTGGGCGT**AAAGAGCT**CGTAGGCGGTT**TGT**CACGT**CGGTTGT**GAAAAG**CCCGGGGCT** 591  
Scoelicolor **GGGCGCAAGCGTTGTCCGGAA**TATTGGGCGT**AAAGAGCT**CGTAGGCGGTT**TGT**CACGT**CGGTTGT**GAAAAG**CCCGGGGCT** 594  
FalniACN14a **GGGTGCAAGCGTTGTCCGGAA**TATTGGGCGT**AAAGAGCT**CGTAGGCGGCT**TGT**CGCGT**CGGCTGT**GAAAA**CCCGGGGCT** 585  
FCcI3 **GGATGCAAGCGTTGTCCGGAA**TATTGGGCGT**AAAGAGCT**CGTAGGCGGCT**TGT**CGCGT**CGGCTGT**GAAAA**CCCGGGGCT** 585  
FEAN1pec **GGGTGCAAGCGTTGTCCGGAA**TATTGGGCGT**AAAGAGCT**CGTAGGCGGCT**TGT**CGCGT**CGGCTGT**GAAAA**CCCGGGGCT** 583  
Acellulolyticus **GGGTGCAAGCGTTGTCCGGAA**TATTGGGCGT**AAAGAGCT**CGTAGGCGGTT**TGT**CGCGT**CGGATGT**GAAAA**CCCAGGCT** 582  
MbovisAF2122/97 **GGGTGCGAGCGTTGTCCGGAA**TACTGGGCGT**AAAGAGCT**CGTAGGTTGGTT**TGT**CGCGTT**GTTCGT**GAAAT**CTCACGGCT** 610  
MtberculosisH37Rv **GGGTGCGAGCGTTGTCCGGAA**TACTGGGCGT**AAAGAGCT**CGTAGGTTGGTT**TGT**CGCGTT**GTTCGT**GAAAT**CTCACGGCT** 610  
MbovisPasteur **GGGTGCGAGCGTTGTCCGGAA**TACTGGGCGT**AAAGAGCT**CGTAGGTTGGTT**TGT**CGCGTT**GTTCGT**GAAAT**CTCACGGCT** 610  
MtberculosisCDC1551 **GGGTGCGAGCGTTGTCCGGAA**TACTGGGCGT**AAAGAGCT**CGTAGGTTGGTT**TGT**CGCGTT**GTTCGT**GAAAT**CTCACGGCT** 609  
Mulcerans **GGGTGCGAGCGTTGTCCGGAA**TACTGGGCGT**AAAGAGCT**CGTAGGTTGGTT**TGT**CGCGTT**GTTCGT**GAAAT**CTCACGGCT** 608  
Mavium **GGGTGCGAGCGTTGTCCGGAA**TACTGGGCGT**AAAGAGCT**CGTAGGTTGGTT**TGT**CGCGTT**GTTCGT**GAAAT**CTCACGGCT** 596  
MaviumK-10 **GGGTGCGAGCGTTGTCCGGAA**TACTGGGCGT**AAAGAGCT**CGTAGGTTGGTT**TGT**CGCGTT**GTTCGT**GAAAT**CTCACGGCT** 608  
MlepraeTN **GGGTGCGAGCGTTGTCCGGAA**TACTGGGCGT**AAAGAGCT**CGTAGGTTGGTT**TGT**CGCGTT**GTTCGT**GAAA**CTCACGGCT** 621  
MJLS **GGGTCCGAGCGTTGTCCGGAA**TACTGGGCGT**AAAGAGCT**CGTAGGTTGGTT**TGT**CGCGTT**GTTCGT**GAAAA**CCGGGGGCT** 586  
MKMS **GGGTCCGAGCGTTGTCCGGAA**TACTGGGCGT**AAAGAGCT**CGTAGGTTGGTT**TGT**CGCGTT**GTTCGT**GAAAA**CCGGGGGCT** 586  
MMCS **GGGTCCGAGCGTTGTCCGGAA**TACTGGGCGT**AAAGAGCT**CGTAGGTTGGTT**TGT**CGCGTT**GTTCGT**GAAAA**CCGGGGGCT** 587  
Msmegmatis **GGGTCCGAGCGTTGTCCGGAA**TACTGGGCGT**AAAGAGCT**CGTAGGTTGGTT**TGT**CGCGTT**GTTCGT**GAAAA**CTCACAGCT** 599  
Mvanbaalenii **GGGTCCGAGCGTTGTCCGGAA**TACTGGGCGT**AAAGAGCT**CGTAGGTTGGTT**TGT**CGCGTT**GTTCGT**GAAAA**CTCACAGCT** 586  
Nfarcinica **GGGTGCGAGCGTTGTCCGGAA**TACTGGGCGT**AAAGAGCT**CGTAGGCGGTT**TGT**CGCGT**CTCCGT**GAAAA**CTGGGGCT** 594  
RRH1 **GGGTGCAAGCGTTGTCCGGAA**TACTGGGCGT**AAAGAGCT**CGTAGGCGGTT**TGT**CGCGT**CTTTGT**GAAAA**CTCACAGCT** 593  
Cdiphtheriae **GGGTGCGAGCGTTGTCCGGAA**TACTGGGCGT**AAAGAGCT**CGTAGGTTGGTT**TGT**CGCGT**CTCTGT**GAAAT**CTCCGGGCT** 565  
Cjeikeium **GGGTGCGAGCGTTGTCCGGAA**TACTGGGCGT**AAAGAGCT**CGTAGGTTGGTT**TGT**CGCGT**CTCTGT**GAAAT**CTCCGGGCT** 600  
Cefficiens **GGGTGCGAGCGTTGTCCGGAA**TACTGGGCGT**AAAGAGCT**CGTAGGTTGGTT**TGT**CGCGT**CTCTGT**GAAAT**CTCCGGGCT** 576  
Cglutamicum **GGGTGCGAGCGTTGTCCGGAA**TACTGGGCGT**AAAGAGCT**CGTAGGTTGGTT**TGT**CGCGT**CTCTGT**GAAAT**CTCCGGGCT** 596  
Nocardioides **GGGTGCGAGCGTTGTCCGGAA**TATTGGGCGT**AAAGGGCT**CGTAGGCGGTT**TGT**CGCGT**CGGGAGT**GAAAA**CACTGGGCT** 596  
Pacnes **GGGTGCGAGCGTTGTCCGGAA**TATTGGGCGT**AAAGGGCT**CGTAGGTTGGTT**TGT**CGCGT**CGGAAGT**GTAAT**CTTTGGGCT** 590  
TfuscaYX **GGGTCCGAGCGTTGTCCGGAA**TATTGGGCGT**AAAGAGCT**CGTAGGCGGCT**TGT**CGCGT**CTGCTGT**GAAAA**CTCCGGGCT** 582  
Rxylianophilus **GGGGTCCGAGCGTTGTCCGGAA**TACTGGGCGT**AAAGAGCT**CGTAGGCGGCT**TGT**CGCGT**CTGCTGT**GAAAA**CCCGGGGCT** 596  
ruler .....570.....580.....590.....600.....610.....620.....630.....640

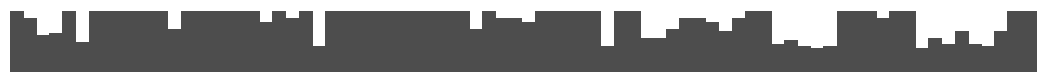







\*\*\*\*\* \* \*\*\*\*\* \*\* \*\*\*\* \*  
 Badolescentis CAAGCGGCGGAGCATGCGGATTAATTGATGCAACGCGAAGAACTTACCTGGGCTTGACATGT-TCCCGACAGCCCCAG 1002  
 Blongum CAAGCGGCGGAGCATGCGGATTAATTGATGCAACGCGAAGAACTTACCTGGGCTTGACATGT-TCCCGACGGTCGTAG 996  
 Aaurescens CAAGCGGCGGAGCATGCGGATTAATTGATGCAACGCGAAGAACTTACCAAGGCTTGACATGA-ACCGGAAAGACCTGG 970  
 AFB24 CAAGCGGCGGAGCATGCGGATTAATTGATGCAACGCGAAGAACTTACCAAGGCTTGACATGG-CCCGGACCGGGCTGG 984  
 TTWist CAAGCGGCGGAGCATGCGGATTAATTCAATGCAACGCGAAGAACTTACCAAGGCTTGATATAT-ACCGGAAAGGCGTAG 996  
 TTW08/27 CAAGCGGCGGAGCATGCGGATTAATTCAATGCAACGCGAAGAACTTACCAAGGCTTGATATAT-ACCGGAAAGGCGTAG 996  
 Lxlyi CAAGCGGCGGAGCATGCGGATTAATTGATGCAACGCGAAGAACTTACCAAGGCTTGACATAT-ACGAGAAACGGGCTAG 965  
 Savermitilis CAAGCAGCGGAGCATGTGGCTTAATTGACGCAACGCGAAGAACTTACCAAGGCTTGACATAC-ACCGGAAAGCATTAG 988  
 Scoelicolor CAAGCGGCGGAGCATGTGGCTTAATTGACGCAACGCGAAGAACTTACCAAGGCTTGACATAC-ACCGGAAAGCATCAG 991  
 FalniACN14a CAAGCGGCGGAGCATGTGGCTTAATTGATGCAACGCGAAGAACTTACCAAGGCTTGACATGC-AGGGAAATCTCGTAG 982  
 FCcI3 CAAGCGGCGGAGCATGTGGCTTAATTGATGCAACGCGAAGAACTTACCAAGGCTTGACATGC-AGGGAAATCTCGTAG 982  
 FEAN1pec CAAGCGGCGGAGCATGTGGCTTAATTGATGCAACGCGAAGAACTTACCAAGGCTTGACATGC-AGAGAAATCCGTAG 980  
 Acellulolyticus CAAGCGGCGGAGCATGTGGCTTAATTGATGCAACGCGAAGAACTTACCTGGGCTTGACATGC-AGGGAAATCCGCGAG 979  
 MbovisAF2122/97 CAAGCGGCGGAGCATGTGGATTAATTGATGCAACGCGAAGAACTTACCTGGGTTTGACATGC-ACAGGACGCGCTAG 1007  
 MtuberculosisH37Rv CAAGCGGCGGAGCATGTGGATTAATTGATGCAACGCGAAGAACTTACCTGGGTTTGACATGC-ACAGGACGCGCTAG 1007  
 MbovisPasteur CAAGCGGCGGAGCATGTGGATTAATTGATGCAACGCGAAGAACTTACCTGGGTTTGACATGC-ACAGGACGCGCTAG 1007  
 MtuberculosisCDC1551 CAAGCGGCGGAGCATGTGGATTAATTGATGCAACGCGAAGAACTTACCTGGGTTTGACATGC-ACAGGACGCGCTAG 1006  
 Mulcerans CAAGCGGCGGAGCATGTGGATTAATTGATGCAACGCGAAGAACTTACCTGGGTTTGACATGC-ACAGGACGCGCTAG 1005  
 Mavium CAAGCGGCGGAGCATGTGGATTAATTGATGCAACGCGAAGAACTTACCTGGGTTTGACATGC-ACAGGACGCGCTAG 993  
 MaviumK-10 CAAGCGGCGGAGCATGTGGATTAATTGATGCAACGCGAAGAACTTACCTGGGTTTGACATGC-ACAGGACGCGCTAG 1005  
 MlepraeTN CAAGCGGCGGAGCATGTGGATTAATTGATGCAACGCGAAGAACTTACCTGGGTTTGACATGC-ACAGGACGCGCTAG 1018  
 MJLS CAAGCGGCGGAGCATGTGGATTAATTGATGCAACGCGAAGAACTTACCTGGGTTTGACATGC-ACAGGACGCGCTAG 983  
 MKMS CAAGCGGCGGAGCATGTGGATTAATTGATGCAACGCGAAGAACTTACCTGGGTTTGACATGC-ACAGGACGCGCTAG 983  
 MMCS CAAGCGGCGGAGCATGTGGATTAATTGATGCAACGCGAAGAACTTACCTGGGTTTGACATGC-ACAGGACGCGCTAG 984  
 Msmegmatis CAAGCGGCGGAGCATGTGGATTAATTGATGCAACGCGAAGAACTTACCTGGGTTTGACATGC-ACAGGACGCGCTAG 996  
 Mvanbaalenii CAAGCGGCGGAGCATGTGGATTAATTGATGCAACGCGAAGAACTTACCTGGGTTTGACATGC-ACAGGACGCGCTAG 983  
 Nfarcinica CAAGCGGCGGAGCATGTGGATTAATTGATGCAACGCGAAGAACTTACCTGGGTTTGACATGC-ACCGGAAACCTGCGAG 991  
 RRH1 CAAGCGGCGGAGCATGTGGATTAATTGATGCAACGCGAAGAACTTACCTGGGTTTGACATGC-ACCGGAAAGCCGTAG 989  
 Cdiphtheriae CAAGCGGCGGAGCATGTGGATTAATTGATGCAACGCGAAGAACTTACCTGGGCTTGACATAT-ACAGGACCGGCTAG 962  
 Cjeikeium CAAGCGGCGGAGCATGTGGATTAATTGATGCAACGCGAAGAACTTACCTGGGCTTGACATAC-ACCGGATCGCTGCGAG 999  
 Cefficiens CAAGCGGCGGAGCATGTGGATTAATTGATGCAACGCGAAGAACTTACCTGGGCTTGACATAC-ACTAGAICGCTGCGAG 973  
 Cglutamium CAAGCGGCGGAGCATGTGGATTAATTGATGCAACGCGAAGAACTTACCTGGGCTTGACATGC-ACCGGATCGGCTAG 993  
 Nocardioides CAAGCGGCGGAGCATGCGGATTAATTGATGCAACGCGAAGAACTTACCTGGGTTTGACATAC-GCCGAAAGCGCCAG 993  
 Pacnes CAAGCGGCGGAGCATGCGGATTAATTGATGCAACGCGTAGAACCTTACCTGGGTTTGACATGC-ATCGGGATGCTCAG 987  
 TfuscaYX CAAGCGGCGGAGCATGTGCTTAATTGATGCAACGCGAAGAACTTACCAAGGCTTGACATCA-CCGGTAATCTCAG 978  
 Rxylianophilus CAAGCAGCGGAGCATGTCTTTAATTGATGCAACGCGAAGAACTTACCTGGGCTTGACATGCTGGTGGTAGGCGCCGG 993  
 ruler .....970.....980.....990.....1000.....1010.....1020.....1030.....1040

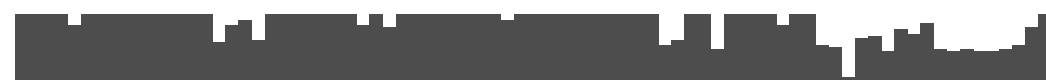

\* \*\*\*\*\* \* \*\*\*\*\* \*\* \*\*\*\* \*  
 Badolescentis AGATGGG--GCCTCCCTTCGGGGCGGGTTCACAGGTGGTGCATGGTTCGTGCTCAGCTCGTGTGCTGAGATGTTGGGTTAA 1080  
 Blongum AGATACG--GCTTCCCTTCGGGGCGGGTTCACAGGTGGTGCATGGTTCGTGCTCAGCTCGTGTGCTGAGATGTTGGGTTAA 1074  
 Aaurescens AAACAGG-TGCCCCGCTT-GCGGTCGGTTACAGGTGGTGCATGGTTCGTGCTCAGCTCGTGTGCTGAGATGTTGGGTTAA 1048  
 AFB24 AAACAGT-CCCTCCCTTTGGGGCCGGTTCACAGGTGGTGCATGGTTCGTGCTCAGCTCGTGTGCTGAGATGTTGGGTTAA 1063  
 TTWist AGATA--GCCCCCCCGC-AAGGTCGGTATACAGGTGGTGCACGGTTCGTGCTCAGCTCGTGTGCTGAGATGTTGGGTTAA 1072  
 TTW08/27 AGATA--CGCCCCCGC-AAGGTCGGTATACAGGTGGTGCACGGTTCGTGCTCAGCTCGTGTGCTGAGATGTTGGGTTAA 1072  
 Lxlyi AAATAGT-CAACTCTTTG-GACACTCGTAAACAGGTGGTGCATGGTTCGTGCTCAGCTCGTGTGCTGAGATGTTGGGTTAA 1043  
 Savermitilis AGATAG--TGCCCCCTT-GTGGTCGGTGTACAGGTGGTGCATGGCTGTCGTGAGATGTTGGGTTAA 1065  
 Scoelicolor AGATGG--TGCCCCCTT-GTGGTCGGTGTACAGGTGGTGCATGGCTGTCGTGAGATGTTGGGTTAA 1068  
 FalniACN14a AGATACG---GGGTCGTAAGGGTCC-TGCACAGGTGGTGCATGGCTGTCGTGAGATGTTGGGTTAA 1058  
 FCcI3 AGATACG---GGGTCGTAAGGGTCC-TGCACAGGTGGTGCATGGCTGTCGTGAGATGTTGGGTTAA 1058  
 FEAN1pec AGATATG---GGGTCCTTAGGGGCTC-TGCACAGGTGGTGCATGGCTGTCGTGAGATGTTGGGTTAA 1056  
 Acellulolyticus AGATGCC---GGGTCGCAAGGGCCC-TGCACAGGTGGTGCATGGCTGTCGTGAGATGTTGGGTTAA 1055  
 MbovisAF2122/97 AGATAGG---CGTTCCTTGTGGCCTGTGTGCAGGTGGTGCATGGCTGTCGTGAGATGTTGGGTTAA 1084  
 MtuberculosisH37Rv AGATAGG---CGTTCCTTGTGGCCTGTGTGCAGGTGGTGCATGGCTGTCGTGAGATGTTGGGTTAA 1084  
 MbovisPasteur AGATAGG---CGTTCCTTGTGGCCTGTGTGCAGGTGGTGCATGGCTGTCGTGAGATGTTGGGTTAA 1084  
 MtuberculosisCDC1551 AGATAGG---CGTTCCTTGTGGCCTGTGTGCAGGTGGTGCATGGCTGTCGTGAGATGTTGGGTTAA 1083  
 Mulcerans AGATAGG---CGTTCCTTGTGGCCTGTGTGCAGGTGGTGCATGGCTGTCGTGAGATGTTGGGTTAA 1082  
 Mavium AGATAGG---CGTTCCTTGTGGCCTGTGTGCAGGTGGTGCATGGCTGTCGTGAGATGTTGGGTTAA 1070  
 MaviumK-10 AGATAGG---CGTTCCTTGTGGCCTGTGTGCAGGTGGTGCATGGCTGTCGTGAGATGTTGGGTTAA 1082  
 MlepraeTN AGATAGG---CACTCCCTTGTGGCCTGTGTGCAGGTGGTGCATGGCTGTCGTGAGATGTTGGGTTAA 1095  
 MJLS AGATATC---AGTTCCTTGTGGCCTGTGTGCAGGTGGTGCATGGCTGTCGTGAGATGTTGGGTTAA 1060  
 MKMS AGATAIC---AGTTCCTTGTGGCCTGTGTGCAGGTGGTGCATGGCTGTCGTGAGATGTTGGGTTAA 1060  
 MMCS AGATAIC---AGTTCCTTGTGGCCTGTGTGCAGGTGGTGCATGGCTGTCGTGAGATGTTGGGTTAA 1061  
 Msmegmatis AGATATC---GGTTCCTTGTGGCCTGTGTGCAGGTGGTGCATGGCTGTCGTGAGATGTTGGGTTAA 1073  
 Mvanbaalenii AGATAGG---TATTCCTTGTGGCCTGTGTGCAGGTGGTGCATGGCTGTCGTGAGATGTTGGGTTAA 1060  
 Nfarcinica AGATGTA---GCCCCCCCTTGGTTCGGTGTACAGGTGGTGCATGGCTGTCGTGAGATGTTGGGTTAA 1068  
 RRH1 AGATACG---GCCCCCCCTTGGTTCGGTGTACAGGTGGTGCATGGCTGTCGTGAGATGTTGGGTTAA 1066  
 Cdiphtheriae TGATACG---TTTCCCTTGTGGTCTGTATACAGGTGGTGCATGGTTCGTGAGATGTTGGGTTAA 1039  
 Cjeikeium AGATGTA---GTTCCCTTGTGGCTGGTGTACAGGTGGTGCATGGCTGTCGTGAGATGTTGGGTTAA 1076  
 Cefficiens AGATGTA---GTTCCCTTGTGGCTGGTGTACAGGTGGTGCATGGTTCGTGAGATGTTGGGTTAA 1050  
 Cglutamium AGATACG---TTTCCCTTGTGGTTCGGTGTACAGGTGGTGCATGGTTCGTGAGATGTTGGGTTAA 1070  
 Nocardioides AGATGG---TTCCCCCCTTGGTTCGGTGTACAGGTGGTGCATGGCTGTCGTGAGATGTTGGGTTAA 1068  
 Pacnes AGATGGGTTGCTCTTTGGGGTTCGGTTCACAGGTGGTGCATGGCTGTCGTGAGATGTTGGGTTAA 1067  
 TfuscaYX AGATGGG---GGTTCCTTCGGGGTTCGGTTCACAGGTGGTGCATGGCTGTCGTGAGATGTTGGGTTAA 1055  
 Rxylianophilus AAACGGTGGCCGACCTTCGGGAGCCAGCAGGTGGTGCATGGCTGTCGTGAGATGTTGGGTTAA 1073  
 ruler .....1050.....1060.....1070.....1080.....1090.....1100.....1110.....1120

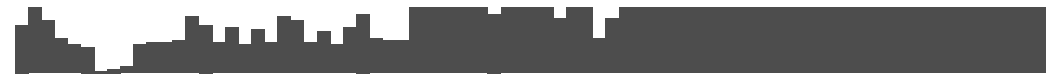







|                      | ***** ** * * * * * ***** * * *                                                     |      |
|----------------------|------------------------------------------------------------------------------------|------|
| Badollescentis       | CCGTCAAGTCATGAAAGTGGGTAGCACCCGAAGCCGGTGC-GCCCAACCTTTTGGGG--GGAGCCGTC---TAAGGTG     | 1463 |
| Blongum              | CCGTCAAGTCATGAAAGTGGGCAGCACCCGAAGCCGGTGC-GCCTAACCCCTTGTGGGATGGAGCCGTC---TAAGGTG    | 1459 |
| Aaurescens           | CCGTCAAGTCACGAAAGTGGTAAACCCGAAGCCGGTGC-GCCTAACCC--TTGTGGG--GGAGCCGTC---GAAGGTG     | 1431 |
| AFB24                | CCGTCAAGTCACGAAAGTGGTAAACCCGAAGCCGGTGC-GCCTAACCCCTTGTGGGAGGGAGCCTGTC---GAAGGTG     | 1448 |
| TTWist               | CCGTCAAGTCATGAAAGTGGTAAACCCGAAGCCGGTGC-ACTTAACTT-TTTT--GGAGAGAGCCGTC---GAAGGTG     | 1454 |
| TTW08/27             | CCGTCAAGTCATGAAAGTGGTAAACCCGAAGCCGGTGC-ACTTAACTT-TTTT-TGGAGAGAGCCGTC---GAAGGTG     | 1455 |
| Lxlyi                | CCGTCAAGTCATGAAAGTGGTAAACCCGAAGCCGGTGC-GCCCAACCC--TTGT--GGAGGGAGCCGTC---GAAGGTG    | 1426 |
| Savermitilis         | CCGTCAAGTCACGAAAGTGGTAAACCCGAAGCCGGTGC-GCCCAACCCCTTGTGGGAGGGAGCCTGTC---GAAGGTG     | 1457 |
| Scoelicolor          | CCGTCAAGTCACGAAAGTGGTAAACCCGAAGCCGGTGC-GCCCAACCCCTTGTGGGAGGGAGCCTGTC---GAAGGTG     | 1460 |
| FalniACN14a          | CCGTCAAGTCACGAAAGTGGTAAACCCGAAGCCGGTGC-GCCTAACCCCTTGTGGG--GGAGCCGTC---GAAGGTG      | 1441 |
| FCcI3                | CCGTCAAGTCACGAAAGTGGTAAACCCGAAGCCGGTGC-GCCTAACCCCTTGTGGG--GGAGCCGTC---GAAGGTG      | 1441 |
| FEAN1pec             | CCGTCAAGTCACGAAAGTGGTAAACCCGAAGCCGGTGC-GCCCAACCCCTTGTGGG--GGAGCCGTC---GAAGGTG      | 1439 |
| Acellulolyticus      | CCGTCAAGTCACGAAAGTGGTAAACCCGAAGCCGGTGC-GCCCAACCCGCAAGGGAGGGAGCCGTC---GAAGGTG       | 1439 |
| MbovisAF2122/97      | CCGTCAAGTCATGAAAGTGGTAAACCCGAAGCCAGTGC-GCCTAACCCCT---GGGAGGGAGCCTGTC---GAAGGTG     | 1466 |
| MtuberculosisH37Rv   | CCGTCAAGTCATGAAAGTGGTAAACCCGAAGCCAGTGC-GCCTAACCCCT---GGGAGGGAGCCTGTC---GAAGGTG     | 1466 |
| MbovisPasteur        | CCGTCAAGTCATGAAAGTGGTAAACCCGAAGCCAGTGC-GCCTAACCCCT---GGGAGGGAGCCTGTC---GAAGGTG     | 1466 |
| MtuberculosisCDC1551 | CCGTCAAGTCATGAAAGTGGTAAACCCGAAGCCAGTGC-GCCTAACCCCT---GGGAGGGAGCCTGTC---GAAGGTG     | 1465 |
| Mulcerans            | CCGTCAAGTCATGAAAGTGGTAAACCCGAAGCCAGTGC-GCCTAACCCCTTTTGGGAGGGAGCCTGTC---GAAGGTG     | 1468 |
| Mavium               | CCGTCAAGTCATGAAAGTGGTAAACCCGAAGCCAGTGC-GCCTAACCCCTTTT--GGGAGGGAGCCTGTC---GAAGGTG   | 1455 |
| MaviumK-10           | CCGTCAAGTCATGAAAGTGGTAAACCCGAAGCCAGTGC-GCCTAACCCCTTTT--GGGAGGGAGCCTGTC---GAAGGTG   | 1467 |
| MlepraeTN            | CCGTCAAGTCATGAAAGTGGTAAACCCGAAGCCAGTGC-GCCTAACCCCT---GGGAGGGAGCCTGTC---CAAGGTG     | 1478 |
| MJLS                 | CCGTCAAGTCATGAAAGTGGTAAACCCGAAGCCGGTGC-GCCTAACCCCTTGTGGGAGGGAGCCGTC---GAAGGTG      | 1446 |
| MKMS                 | CCGTCAAGTCATGAAAGTGGTAAACCCGAAGCCGGTGC-GCCTAACCCCTTGTGGGAGGGAGCCGTC---GAAGGTG      | 1446 |
| MMCS                 | CCGTCAAGTCATGAAAGTGGTAAACCCGAAGCCGGTGC-GCCTAACCCCTTGTGGGAGGGAGCCGTC---GAAGGTG      | 1447 |
| Msmegmatis           | CCGTCAAGTCATGAAAGTGGTAAACCCGAAGCCGGTGC-GCCTAACCC--TTGTGG--AGGGAGCCGTC---GAAGGTG    | 1457 |
| Mvanbaalenii         | CCGTCAAGTCATGAAAGTGGTAAACCCGAAGCCGGTGC-GCCTAACCCCTTGTGGGAGGGAGCCGTC---GAAGGTG      | 1446 |
| Nfarcinica           | CCGTCAAGTCATGAAAGTGGTAAACCCGAAGCCGGTGC-GCCTAACCCCTTGTGGGAGGGAGCCGTC---GAAGGTG      | 1453 |
| RRH1                 | CCGTCAAGTCATGAAAGTGGTAAACCCGAAGCCGGTGC-GCCTAACCCCTTGTGGGAGGGAGCCGTC---GAAGGTG      | 1451 |
| Cdiphtheriae         | CCGTCAAGTCATGAAAGTGGTAAACCCGAAGCCAGTGC-GCCTAACCCCTTGTGGGAGGGAGCCGTC---GAAGGTG      | 1392 |
| Cjeikeium            | CCGTCAAGTCATGAAAGTGGTAAACCCGAAGCCAGTGC-GCCAAACTTGT---TAGGG--AGCTGTC---GAAGGTG      | 1457 |
| Cefficiens           | CCGTCAAGTCATGAAAGTGGTAAACCCGAAGCCAGTGC-GCCAAAC---GGGAGGGAGCCTGTC---GAAGGTG         | 1408 |
| Cglutamicum          | CCGTCAAGTCATGAAAGTGGTAAACCCGAAGCCAGTGC-GCCCAACCTTTT--AGGGGGGAGCCTGTC---GAAGGTG     | 1453 |
| Nocardioides         | CCGTCAAGTCACGAAAGTGGTAAACCCGAAGCCGGTGC-GCCTAACCCCTTGTGGGAGGGAGCCGTC---GAAGGTG      | 1451 |
| Pacnes               | CCGTCAAGTCATGAAAGTGGTAAACCCGAAGCCGGTGC-GCCTAACCCCTTGTGGGAGGGAGCCGTC---GAAGGTG      | 1449 |
| TfuscaYX             | CCGTCAAGTCACGAAAGTGGTAAACCCGAAGCCAGTGC-GCCTAACCCCTTGTGGGAGGGAGCCGTC---GAAGGTG      | 1441 |
| Rxylanophilus        | CCGTCAAGTCACGAAAGTGGTAAACCCGAAGCCAGTGC-GCCTAACCCCTTGTGGGAGGGAGGGGGGCTTGC---GAAGGTG | 1462 |
| ruler                | .....1450.....1460.....1470.....1480.....1490.....1500.....1510.....1520           |      |

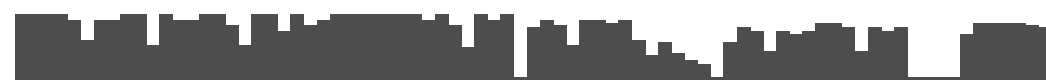

|                      |                                                                                      |      |
|----------------------|--------------------------------------------------------------------------------------|------|
| Badollescentis       | AGACTCGTGAATGGGACTAAGTCGTAAACAAGGTAGCCGTACCGGAAGGTGCGGGCTGGATCACCTCCCTTCT-----       | 1534 |
| Blongum              | AGGCTCGTGAATGGGACTAAGTCGTAAACAAGGTAGCCGTACCGGAAGGTGCGGGCTGGATCACCTCCCTTCT-----       | 1530 |
| Aaurescens           | GGACCGGCGAATGGGACTAAGTCGTAAACAAGGTAGCCGTACCGGAAGGTG-----                             | 1481 |
| AFB24                | GGACTGGCGAATGGGACTAAGTCGTAAACAAGGTAGCCGTACCGGAAGGTGCGGGCTGGATCACCTCCCTTCT-----       | 1517 |
| TTWist               | GGATTGGTGAATGGGACTAAGTCGTAAACAAGGTAGCCGTACCGGAAGGTGCGGGCTGGATCACCTCCCTTCT-----       | 1525 |
| TTW08/27             | GGATTGGTGAATGGGACTAAGTCGTAAACAAGGTAGCCGTACCGGAAGGTGCGGGCTGGATCACCTCCCTTCT-----       | 1526 |
| Lxlyi                | GGGTCGGTGAATAGGACTAAG-----                                                           | 1447 |
| Savermitilis         | GGACTGGCGAATGGGACGAAGTCGTAAACAAGGTAGCCGTACCGGAAGGTGCGGGCTGGATCACCTCCCTTCTAA-----     | 1530 |
| Scoelicolor          | GGACTGGCGAATGGGACGAAGTCGTAAACAAGGTAGCCGTACCGGAAGGTGCGGGCTGGATCACCTCCCTTCT-----       | 1531 |
| FalniACN14a          | GGACCGGCGAATGGGACGAAGTCGTAAACAAGGTAGCCGTACCGGAAGGTGCGGGCTGGATCACCTCCCTTCT-----       | 1510 |
| FCcI3                | GGACCGGCGAATGGGACGAAGTCGTAAACAAGGTAGCCGTACCGGAAGGTGCGGGCTGGATCACCTCCCTTCT-----       | 1512 |
| FEAN1pec             | GGACCGGCGAATGGGACGAAGTCGTAAACAAGGTAGCCGTACCGGAAGGTGCGGGCTGGATCACCTCCCTTCT-----       | 1508 |
| Acellulolyticus      | GGACCGGCGAATGGGACGAAGTCGTAAACAAGGTAGCCGTACCGGAAGGTGCGGGCTGGATCACCTCCCTTCT-----       | 1509 |
| MbovisAF2122/97      | GGATCGGCGAATGGGACGAAGTCGTAAACAAGGTAGCCGTACCGGAAGGTGCGGGCTGGATCACCTCCCTTCT-----       | 1537 |
| MtuberculosisH37Rv   | GGATCGGCGAATGGGACGAAGTCGTAAACAAGGTAGCCGTACCGGAAGGTGCGGGCTGGATCACCTCCCTTCT-----       | 1537 |
| MbovisPasteur        | GGATCGGCGAATGGGACGAAGTCGTAAACAAGGTAGCCGTACCGGAAGGTGCGGGCTGGATCACCTCCCTTCT-----       | 1537 |
| MtuberculosisCDC1551 | GGATCGGCGAATGGGACGAAGTCGTAAACAAGGTAGCCGTACCGGAAGGTGCGGGCTGGATCACCTCCCTTCT-----       | 1536 |
| Mulcerans            | GGATCGGCGAATGGGACGAAGTCGTAAACAAGGTAGCCGTACCGGAAGGTGCGGGCTGGATCACCTCCCTTCT-----       | 1539 |
| Mavium               | GGATCGGCGAATGGGACGAAGTCGTAAACAAGGTAGCCGTACCGGAAGGTGCGGGCTGGATCAC-----                | 1517 |
| MaviumK-10           | GGATCGGCGAATGGGACGAAGTCGTAAACAAGGTAGCCGTACCGGAAGGTGCGGGCTGGATCACCTCCCTTCTAAGGAG----- | 1544 |
| MlepraeTN            | GGATCGGCGAATGGGACGAAGTCGTAAACAAGGTAGCCGTACCGGAAGGTGCGGGCTGGATCACCTCCCTTCT-----       | 1549 |
| MJLS                 | GGATCGGCGAATGGGACGAAGTCGTAAACAAGGTAGCCGTACCGGAAGGTGCGGGCTGGATCACCTCCCTTCT-----       | 1515 |
| MKMS                 | GGATCGGCGAATGGGACGAAGTCGTAAACAAGGTAGCCGTACCGGAAGGTGCGGGCTGGATCACCTCCCTTCT-----       | 1515 |
| MMCS                 | GGATCGGCGAATGGGACGAAGTCGTAAACAAGGTAGCCGTACCGGAAGGTGCGGGCTGGATCACCTCCCTTCT-----       | 1515 |
| Msmegmatis           | GGATCGGCGAATGGGACGAAGTCGTAAACAAGGTAGCCGTACCGGAAGGTGCGGGCTGGATCACCTCCCTTCT-----       | 1528 |
| Mvanbaalenii         | GGATCGGCGAATGGGACGAAGTCGTAAACAAGGTAGCCGTACCGGAAGGTGCGGGCTGGATCACCTCCCTTCT-----       | 1515 |
| Nfarcinica           | GGATCGGCGAATGGGACGAAGTCGTAAACAAGGTAGCCGTACCGGAAGGTGCGGGCTGGATCACCTCCCTTCTAAG-----    | 1527 |
| RRH1                 | GGATCGGCGAATGGGACGAAGTCGTAAACAAGGTAGCCGTACCGGAAGGTGCGGGCTGGATCACCTCCCTTCT-----       | 1519 |
| Cdiphtheriae         | -----                                                                                | 1392 |
| Cjeikeium            | GGATTGGCGAATGGGACGAAGTCGTAAACAAGGTAGCCGTACCGGAAGGTGCGGGCTGGATCACCTCCCTTCT-----       | 1527 |
| Cefficiens           | -----                                                                                | 1408 |
| Cglutamicum          | GGATCGGCGAATGGGACGAAGTCGTAAACAAGGTAGCCGTACCGGAAGGTGCGGGCTGGATCACCTCCCTTCT-----       | 1524 |
| Nocardioides         | GGGCTGGCGAATGGGACGAAGTCGTAAACAAGGTAGCCGTACCGGAAGGTGCGGGCTGGATCACCTCCCTTCT-----       | 1520 |
| Pacnes               | GGACTGGTGAATAGGACTAAGTCGTAAACAAGGTAGCCGTACCGGAAGGTGCGGGCTGGATCACCTCCCTTCTAAGGA-----  | 1525 |
| TfuscaYX             | GGGCTGGCGAATGGGACGAAGTCGTAAACA-----                                                  | 1471 |
| Rxylanophilus        | GGGCGGCGAATGGGACGAAGTCGTAAACAAGGTAGCCGTACCTGAAGGTGC-----                             | 1513 |
| ruler                | .....1530.....1540.....1550.....1560.....1570.....1580.....1590.....                 |      |

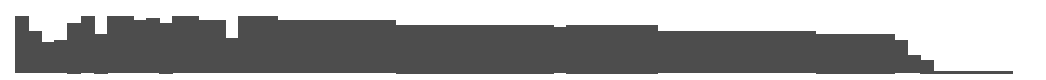

Supplement: 1471-2148-8-185-S6.pdf [file 1471-2148-8-185-S6.pdf]
