# Supplementary material for: On the nature of fur evolution: A phylogenetic approach in Actinobacteria
Source: PubMed Central journal article supplement (PMC2464607; doi:10.1186/1471-2148-8-185), 2008-06-25

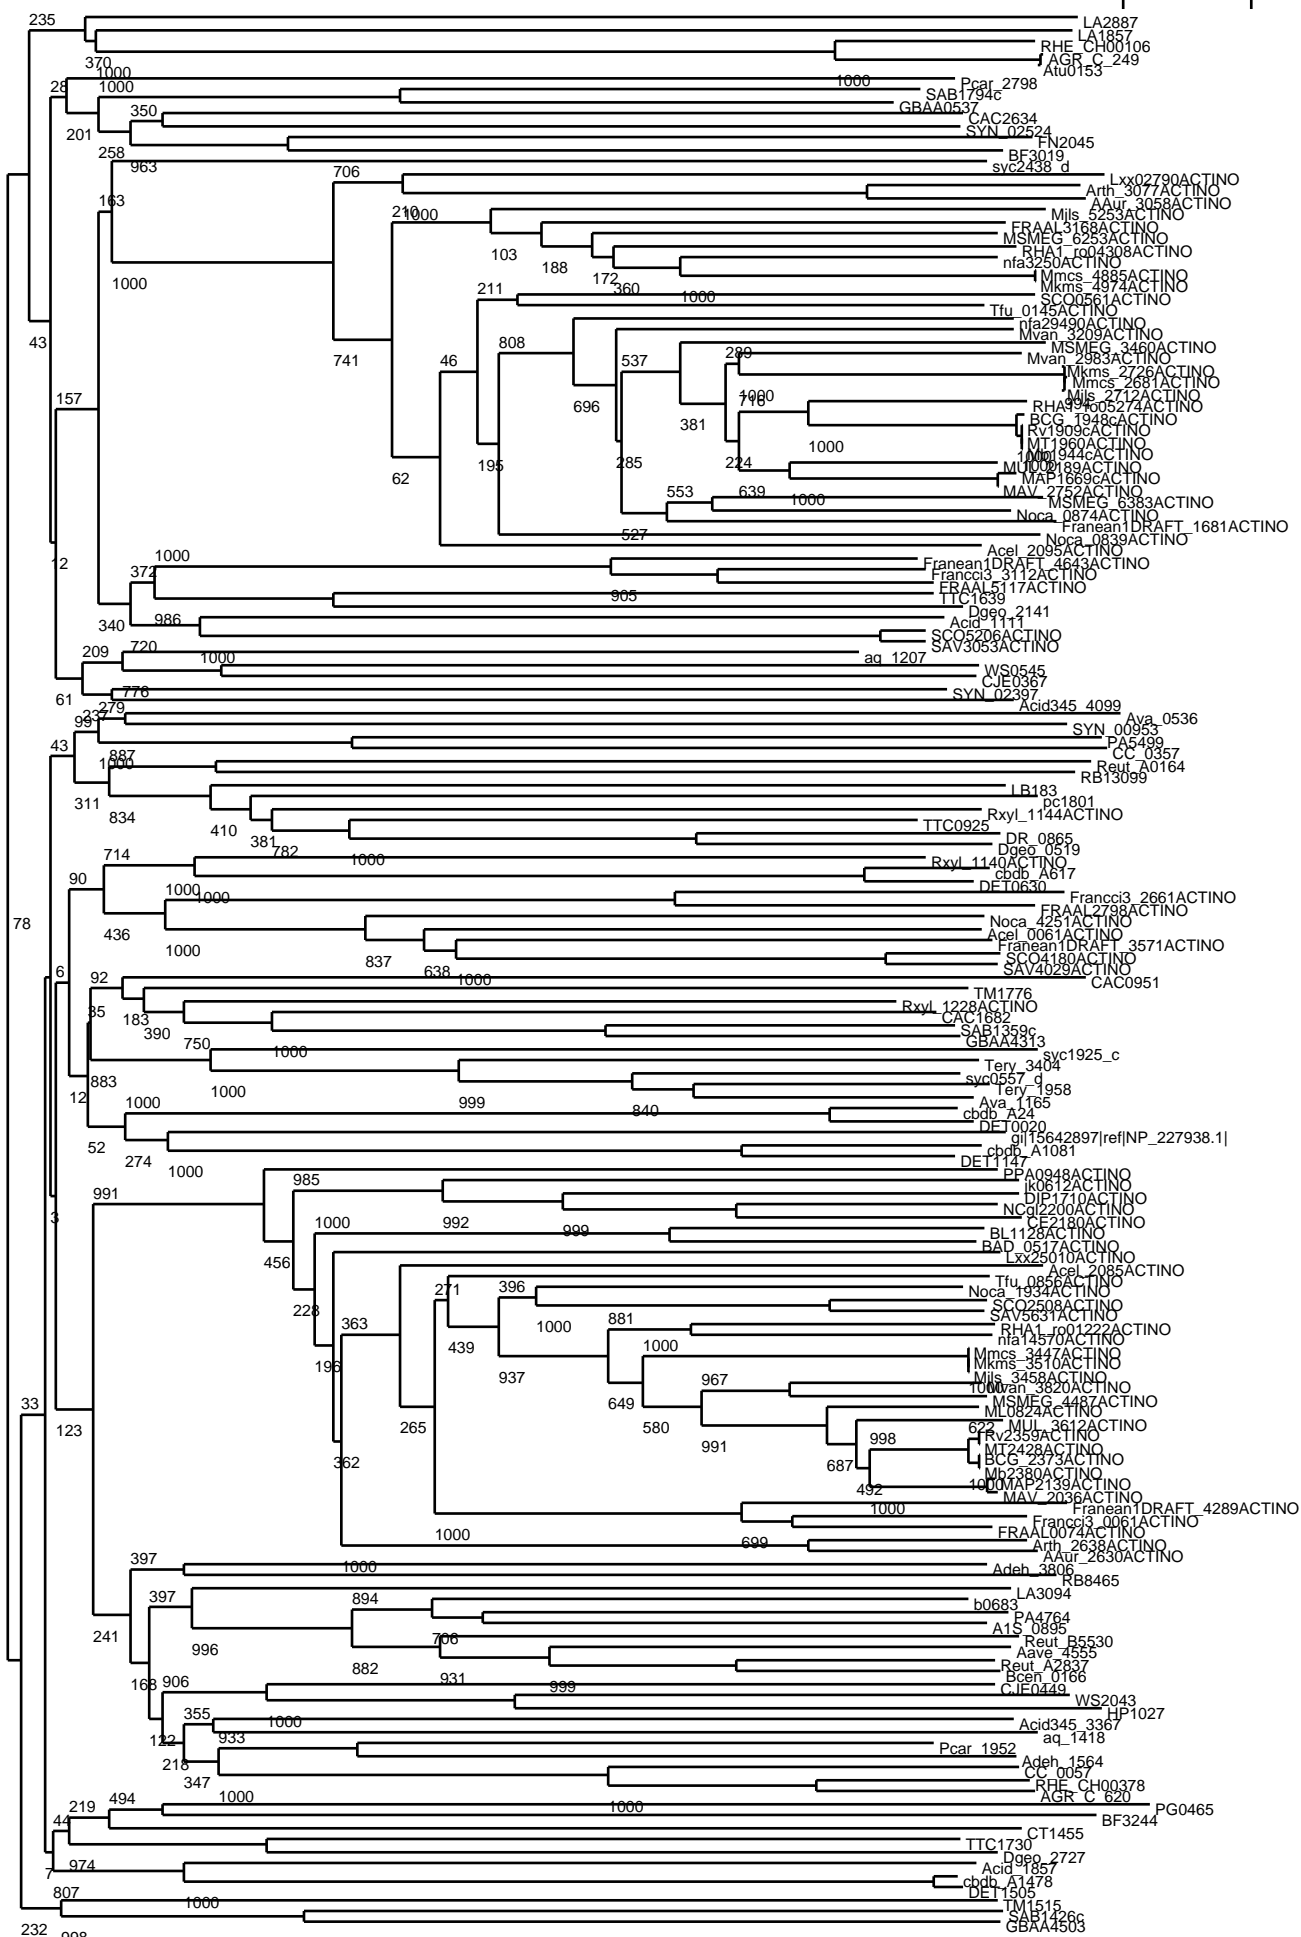

Supplement: 1471-2148-8-185-S5.pdf [file 1471-2148-8-185-S5.pdf]
